# Supplementary material for: Antiviral therapy for prevention of hepatocellular carcinoma and mortality in chronic hepatitis B: systematic review and meta-analysis
Source: PubMed Central journal article supplement — BMJ Open. 2013 Aug 13;3(8):e003265. doi: 10.1136/bmjopen-2013-003265 (PMC3752055; doi:10.1136/bmjopen-2013-003265), 2013-08-13
Supplement: bmjopen-2013-003265.draft_revisions.pdf [file bmjopen-2013-003265.draft_revisions.pdf]

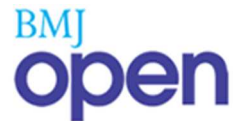

**ANTIVIRAL THERAPY FOR PREVENTION OF  
HEPATOCELLULAR CARCINOMA AND MORTALITY IN  
CHRONIC HEPATITIS B: SYSTEMATIC REVIEW AND META-  
ANALYSIS**

|                                 |                                                                                                                                                                                                                                                                                                                                           |
|---------------------------------|-------------------------------------------------------------------------------------------------------------------------------------------------------------------------------------------------------------------------------------------------------------------------------------------------------------------------------------------|
| Journal:                        | <i>BMJ Open</i>                                                                                                                                                                                                                                                                                                                           |
| Manuscript ID:                  | bmjopen-2013-003265                                                                                                                                                                                                                                                                                                                       |
| Article Type:                   | Research                                                                                                                                                                                                                                                                                                                                  |
| Date Submitted by the Author:   | 21-May-2013                                                                                                                                                                                                                                                                                                                               |
| Complete List of Authors:       | Thiele, Maja; Odense University Hospital, Department of Gastroenterology and Hepatology<br>Gluud, Lise; Copenhagen University Hospital Gentofte, Department of Medicine<br>Dahl, Emilie; Copenhagen University, Faculty of Health Sciences<br>Krag, Aleksander; Odense University Hospital, Department of Gastroenterology and Hepatology |
| <b>Primary Subject Heading</b>: | Gastroenterology and hepatology                                                                                                                                                                                                                                                                                                           |
| Secondary Subject Heading:      | Evidence based practice                                                                                                                                                                                                                                                                                                                   |
| Keywords:                       | Adult gastroenterology < GASTROENTEROLOGY, Hepatobiliary disease < GASTROENTEROLOGY, Hepatobiliary tumours < ONCOLOGY                                                                                                                                                                                                                     |
|                                 |                                                                                                                                                                                                                                                                                                                                           |

SCHOLARONE™  
Manuscripts

Only

1  
2  
3  
4 **ANTIVIRAL THERAPY FOR PREVENTION OF**  
5  
6  
7 **HEPATOCELLULAR CARCINOMA AND MORTALITY IN**  
8  
9  
10 **CHRONIC HEPATITIS B: SYSTEMATIC REVIEW AND META-**  
11  
12 **ANALYSIS**  
13

14  
15  
16  
17  
18  
19 **Short title:** Antiviral therapy for hepatitis B  
20  
21

22  
23  
24  
25 Maja Thiele *research associate*<sup>1</sup>, Lise-Lotte Gluud *associate professor*<sup>2</sup>, Emilie Kirstine  
26  
27 Dahl *research assistant*<sup>3</sup>, Aleksander Krag *professor of hepatology*<sup>1</sup>.  
28  
29

30  
31  
32  
33  
34 **Author affiliations:** <sup>1</sup>Department of Gastroenterology and Hepatology, Odense University  
35  
36 Hospital, Sdr. Boulevard 29, DK-5000 Odense, Denmark; <sup>2</sup>Department of Medicine,  
37  
38 Copenhagen University Hospital of Gentofte, Niels Andersensvej 65, DK-2900 Hellerup,  
39  
40 Denmark; <sup>3</sup>Faculty of Health Sciences, University of Copenhagen, Blegdamsvej 3, DK-  
41  
42 2100 Copenhagen, Denmark.  
43  
44

45  
46 **Correspondence to:** M. Thiele, Department of Gastroenterology and Hepatology, Odense  
47  
48 University Hospital, Sdr. Boulevard 29, entrance 126, 2. floor, DK-5000 Odense C,  
49  
50 Denmark. Email: maja.thiele@rsyd.dk  
51  
52

53  
54 **Abstract word count: 298**  
55

56  
57 **Total word count: 5790**  
58  
59  
60

## ABSTRACT

**Background:** The effect of antiviral therapy on clinical outcomes in chronic hepatitis B (HBV) is not established.

**Objectives:** To assess the effect of antiviral treatment (interferon and/or nucleoside analogues) versus placebo or no intervention on prevention of hepatocellular carcinoma (HCC) and mortality in chronic hepatitis B.

**Design:** Random effects pair-wise meta-analysis of randomised trials and observational studies.

**Data sources:** Electronic and manual searches were combined.

**Study selection:** Randomised controlled trials (RCTs) were included in the primary analyses. Observational studies were included in sensitivity analyses.

**Data extraction:** Two independent reviewers extracted data and evaluated bias control. The primary outcome measures were HCC incidence and mortality.

**Data synthesis:** We included eight RCTs, eight prospective cohort studies and 19 case-control studies with a total of 3433 patients allocated to antiviral therapy and 4625 controls. The maximum duration of follow up was 23 years. Randomised trials found no effect of antiviral therapy on HCC or mortality. Cohort studies found that antiviral therapy increased the risk of HCC (risk ratio 1.43; 95% confidence interval 1.06 to 1.95) whereas case control studies found a decreased risk of HCC in the intervention group (risk ratio 0.69; 95% confidence interval 0.54 to 0.88). There was a clear difference between the results of RCTs and observational studies (test for subgroup differences  $P < 0.001$ ).

1  
2  
3  
4 Antiviral therapy did not affect mortality in cohort studies, but reduced mortality in case  
5  
6 control studies (relative risk 0.71; 95% confidence interval 0.54 to 0.93; test for subgroup  
7  
8 differences, P=0.406).  
9

10  
11 **Conclusions:** The effect of antiviral therapy on clinical outcomes in HBV remains to be  
12  
13 established. Although there was a positive effect in the sensitivity analyses, the strength of  
14  
15 the evidence does not allow for extrapolation to clinical practice as research design plays  
16  
17 an essential role in the overall assessment.  
18  
19

20  
21 **Trial registration number:** Prospero number CRD42013003881  
22  
23  
24  
25  
26  
27  
28  
29  
30  
31  
32  
33  
34  
35  
36  
37  
38  
39  
40  
41  
42  
43  
44  
45  
46  
47  
48  
49  
50  
51  
52  
53  
54  
55  
56  
57  
58  
59  
60

## ARTICLE SUMMARY

### Article focus

- The effect of antiviral treatment for chronic hepatitis B has been assessed using surrogate markers.
- An evaluation of the effect on hepatocellular carcinoma and mortality is missing.

### Key messages

- Research design plays an essential role on hepatocellular carcinoma incidence estimates. As prospective cohorts and case-control series show opposing results, reports from such trials should be interpreted with caution.
- Sensitivity analyses show a positive effect of treatment on mortality

### Strengths and limitations of this study

- A large number of observational studies were included allowing for detailed sensitivity analyses with tests for subgroup differences
- Only 8 randomised controlled trials were included
- The effect of modern nucleos(t)ides could not be assessed as newer trials does not include placebo treated or untreated patients in the control groups

## INTRODUCTION

Worldwide, two billion people have been infected with hepatitis B. Chronic hepatitis B (HBV) may lead to hepatocellular carcinoma (HCC), cirrhosis and liver failure and each year, about 600 000 people die due to hepatitis<sup>1-3</sup>. Globally, HCC is the fifth most common cause of cancer deaths in men, and the sixth in women<sup>4-6</sup>. Vaccine programs have decreased the incidence of HBV<sup>7 8</sup>, but mortality from HBV related HCC and cirrhosis is increasing due to the high prevalence of chronically infected patients<sup>9 10</sup>. The aim of antiviral treatment is to prevent progression to these clinical outcome measures<sup>11-13</sup>. Recommended treatments include interferon and nucleos(t)ide analogues (NA)<sup>14 15</sup>. A viral response may reduce the risk of HCC<sup>12</sup>, but the results of clinical studies and meta-analyses on antiviral therapy are not consistent<sup>16-24</sup>. One meta-analysis<sup>25</sup> found that antiviral therapy decreased liver-related mortality whereas a cohort series found decreased overall mortality in patients with a viral response to interferon<sup>26</sup>. On the other hand, RCTs have failed to show an effect on HCC or mortality<sup>27 28</sup>. We therefore conducted a systematic review of the evidence on antiviral treatment for prevention of HCC and mortality in patients with HBV.

## METHODS

### Scope

This systematic review evaluates the effects of antiviral therapy versus placebo or no intervention on prevention of HCC and mortality in patients with HBV. The review is based on a registered written protocol (Prospero number CRD42013003881) according to the methods specified in the Cochrane Handbook for Reviews on Interventions<sup>29</sup> and the MOOSE Guidelines for Meta-Analyses and Systematic Reviews of Observational Studies<sup>30</sup>. For a more detailed description of the methods, please see the MOOSE checklist (appendix 1).

### Data sources

Eligible trials were identified through electronic and manual searches. Electronic searches were performed in MEDLINE (1966-2012), EMBASE (1928-2012), and Web of Science (1900-2012). Literature searches included keywords for HCC, chronic hepatitis B, and antiviral treatment. Manual searches included scanning of reference lists in relevant papers and conference proceedings and the International Clinical Trials Registry Platform.

### Study selection

Our primary analyses included RCTs (primary analyses) on antiviral interventions (interferon and/or NA) versus placebo or no intervention for patients with HBV who had not previously received antiviral therapy (treatment naïve). Due to the expected prognosis and the duration of follow up necessary to evaluate intervention effects on clinical outcome measures in HBV, observational studies were included in sensitivity analyses. The primary outcome measures were HCC diagnosed using recommended criteria<sup>31 32</sup> and all-cause

1  
2  
3  
4 mortality. To avoid prevalent cases of HCC the outcomes were assessed after at least 12  
5  
6 months of follow up. The secondary outcome measure was HCC related mortality.  
7  
8

## 9 10 **Data extraction and quality assessment**

11  
12 Two authors extracted data in an independent manner. When data were not available in  
13  
14 the published reports, additional information was retrieved through correspondence with  
15  
16 the primary investigators.  
17  
18

19  
20 The Cochrane Collaboration's Tool for Assessing Risk of Bias was used to evaluate bias  
21  
22 control in RCTs. The assessment included the randomisation methods (allocation  
23  
24 sequence generation and allocation concealment), blinding (of participants, personnel and  
25  
26 investigators), the completeness of outcome data, reporting of data and other biases<sup>33</sup>. All  
27  
28 observational studies were classed as having a high risk of bias. Based on the MOOSE  
29  
30 guidelines, the assessment of potential sources of bias within observational studies  
31  
32 included documentation of how data were classified and coded (multiple raters, blinding  
33  
34 and interrater reliability), assessment of confounding (comparability of cases and controls  
35  
36 in studies where appropriate) and blinding of quality assessors, stratification or regression  
37  
38 on possible predictors of study results.  
39  
40  
41  
42

## 43 44 **Data synthesis and analysis**

45  
46 Statistics were performed using Stata Version 12 (Statacorp, College Station, TX, USA)  
47  
48 and Trial Sequential Analysis (CTU, Copenhagen, Denmark). Meta-analyses were  
49  
50 performed with results expressed as risk ratios, 95% CI and  $I^2$  as a marker of  
51  
52 heterogeneity. For meta-analyses showing a statistically significant effect the number  
53  
54 needed to treat was calculated based on the risk difference. Initial sensitivity analyses  
55  
56  
57  
58  
59  
60



1  
2  
3  
4 included repeating all meta-analyses using both random and fixed effect models. The  
5  
6 results of these analyses were only reported if the conclusions differed. Regression  
7  
8 analyses were performed to assess for publication bias and other small study effects  
9  
10 (Egger's test). Sequential analyses were performed for meta-analyses showing an  
11  
12 intervention effect after adjusting for the risk of bias associated with cumulative testing<sup>34</sup>.  
13  
14 The sequential analysis was performed using a random-effects model, alpha (5%), power  
15  
16 (80%) and the incidence rates and the intervention effects identified in the meta-analyses.  
17  
18 Pre-planned sensitivity analyses were performed with inclusion of observational studies.  
19  
20 These analyses were performed stratified by study design (RCT, prospective cohort or  
21  
22 case-control study) and with fixed-effect inverse variance models that compared the  
23  
24 results of subgroups. The result of the subgroup comparisons was expressed as P values  
25  
26 (test for subgroup differences). Additional sensitivity analyses were performed to evaluate  
27  
28 the influence of bias control (limiting the analysis to trials with adequate randomisation),  
29  
30 the type of antiviral therapy (comparing interferon, NA or both), and the effect HCC  
31  
32 screening (comparing the results of trials with or without screening). Finally, subgroup  
33  
34 analyses including only patients with cirrhosis were performed.  
35  
36  
37  
38  
39  
40  
41  
42  
43  
44  
45  
46  
47  
48  
49  
50  
51  
52  
53  
54  
55  
56  
57  
58  
59  
60

## RESULTS

### Literature searches and study inclusion

The electronic and manual searches identified 27 474 potentially relevant records (figure 1). After excluding duplicates and studies that did not fulfil our inclusion criteria, 36 references referring to eight RCTs, eight prospective cohort studies and 19 case control studies were included<sup>26-28 35-67</sup>.

### Characteristics of included RCTs and observational studies

The RCTs were conducted in Europe (n=4), Asia (n=2) and Africa (n=2). The duration of follow up ranged from one to 11 years. One trial performed HCC screening. Six trials assessed interferon and two trials NA (table 1). The proportion of men ranged from 70 to 100% and the mean age from 33 to 44 years. The proportion of patients with cirrhosis at inclusion ranged from zero to 66% (table 2). The proportion of patients with a virological response ranged from seven to 58% in the treatment group and from one to 22% of controls. A biochemical response was achieved for 14 to 66% of patients in the treatment and one to 20% of controls. The randomisation methods were described as adequate in three trials (table 3).

The prospective cohorts and case control studies were conducted in Europe (n=12), Asia (n=13), North America (n=1) and South America (n=1). The duration of follow up ranged from two to 23 years. HCC screening was performed in all prospective cohort studies and in 13 of the case control studies. Eighteen studies assessed interferon, seven assessed NA and two combined therapy with interferon and NA (table 1). The proportion of men ranged from 53 to 95% and the mean age from 27 to 65 years. The proportion of patients

1  
2  
3  
4 with cirrhosis ranged from zero to 100% (table 2). In the prospective cohorts, the  
5  
6 proportion of patients with a virological response in the treatment and control groups was  
7  
8 23 to 69% and zero to 23%, respectively. A biochemical response was achieved for 23 to  
9  
10 69% of patients in the treatment groups and 31% in the control group (only reported in one  
11  
12 study). In the case control series, the proportion of patients with a virological response in  
13  
14 the treatment and control group ranged from 7 to 78% and two to 100%, respectively. A  
15  
16 biochemical response in the two groups was 27 to 68% and four to 51%, respectively.  
17  
18  
19

## 20 21 **Prevention of HCC**

22  
23 HCC was diagnosed in 22 of 840 patients in the treatment group versus 19 of 447 controls  
24  
25 (relative risk 0.58; 95% confidence interval 0.32-1.07;  $I^2=0\%$ ). There was no evidence of  
26  
27 small study effects (Egger's test,  $P=0.269$ ) and no difference between subgroups of trials  
28  
29 assessing interferon or NA (test for subgroup differences  $P=0.854$ ). The overall result was  
30  
31 confirmed in sensitivity analyses including RCTs with a low risk of bias and trials with HCC  
32  
33 screening.  
34  
35

36  
37 Sensitivity analyses including prospective cohort studies and case control studies were  
38  
39 performed. In the cohort studies, HCC was diagnosed in 51 of 689 patients in the  
40  
41 treatment group and 174 of 2283. In the case control studies the numbers were 99 of 1904  
42  
43 and 201 of 1895 patients, respectively. A meta-analysis that combined RCTs and  
44  
45 observational studies found no effect of antiviral therapy on HCC (relative risk 0.88; 95%  
46  
47 confidence interval 0.73 to 1.05;  $I^2=63\%$ ). There was no evidence of small study effects  
48  
49 (Egger's test  $P=0.730$ ). Subgroup analyses showed a clear difference between the RCTs,  
50  
51 prospective cohorts and case control studies (test for subgroup differences  $P<0.001$ )  
52  
53 (figure 2). The prospective cohort studies found that antiviral therapy increased the risk of  
54  
55  
56  
57  
58  
59  
60

1  
2  
3  
4 HCC (relative risk 1.44; 95% confidence interval 1.06 to 1.95) whereas the case control  
5  
6 studies found that antiviral therapy reduced the risk of HCC (relative risk 0.69; 95%  
7  
8 confidence interval 0.54 to 0.88). Due to the high heterogeneity, a post-hoc meta-  
9  
10 regression analysis was performed. We evaluated study and patient characteristics not  
11  
12 accounted for in the sensitivity analyses, which may have influenced the result. No  
13  
14 modifiers were found when adjusting for the following variables: proportion of men  
15  
16 (coefficient -0.074; P=0.08) mean age of treated patients at inclusion (coefficient 0.020;  
17  
18 P=0.94), mean age of untreated patients at inclusion (coefficient 0.121; P=0.65),  
19  
20 proportion with cirrhosis at inclusion (coefficient -0.001; P=0.76), and region of trial  
21  
22 (coefficient -0.394; P=0.55).  
23  
24  
25  
26  
27  
28  
29

30  
31 Sensitivity analyses were performed to evaluate the risk of HCC among patients with  
32  
33 cirrhosis. In the RCTs, one of 20 patients in the treatment group and two of 12 controls  
34  
35 developed HCC (relative risk 0.75; 95% confidence interval 0.10 to 5.77). In the  
36  
37 prospective cohort studies 32 of 184 versus 142 of 482 patients developed HCC whereas  
38  
39 the numbers were 63 of 680 versus 161 of 955, respectively for case control studies.  
40  
41 Overall, antiviral therapy reduced the risk of HCC when including data from RCTs and  
42  
43 observational studies (relative risk 0.74; 95% confidence interval 0.57 to 0.96;  $I^2=0\%$ ;  
44  
45 number needed to treat 28 patients) (fig 3). The results of RCTs and observational studies  
46  
47 were similar (test for subgroup differences P=0.159). There was no evidence of small  
48  
49 study effects (Egger's test P=0.890). In trial sequential analysis, the monitoring and alpha-  
50  
51 spending boundary did not cross suggesting that the result was not robust to adjustment  
52  
53 for multiple testing.  
54  
55  
56  
57  
58  
59  
60

## Mortality

In the RCTs, there was no difference in mortality between the treatment and control group (21 of 840 versus 9 of 447 patients; relative risk 1.24; 95% confidence interval 0.58 to 2.66;  $I^2=0\%$ ). No evidence of small study effects (Egger's test  $P=0.783$ ) and no difference between trials stratified by treatment (test for subgroup differences  $P=0.668$ ) or HCC screening ( $P=0.828$ ). In the observational studies, the number of patients in the treatment and control groups who died was 51 of 689 versus 247 of 2283 for prospective cohort studies and 71 of 1904 versus 92 of 1895 in the cohort studies. When combining RCTs and observational studies, random effects meta-analysis showed that antiviral treatment decreased mortality (relative risk 0.76; 95% confidence interval 0.62 to 0.95;  $I^2=14\%$ ; number needed to treat 77; Egger's test  $P=0.487$ ) (fig 4). There was no difference between RCTs and observational studies (test for subgroup differences  $P=0.406$ ). In the trial sequential analysis, the monitoring boundary crossed the alpha-spending boundary in 2004 suggesting that the meta-analysis was robust to adjustments for multiple testing.

Only observational studies reported mortality in patients with cirrhosis. The number of patients who died in the intervention and control groups was 36 of 864 versus 141 of 1 477 (relative risk 0.61; 95% confidence interval 0.44 to 0.86;  $I^2=9\%$ ; number needed to treat 16 patients). There were no small study effects (Egger's test  $P=0.533$ ) and no difference between prospective cohort and case control studies (test for subgroup differences  $P=0.292$ ).

## HCC related mortality

Antiviral therapy had no effect on HCC related mortality (3 of 840 versus 2 of 447; relative risk 0.50; 95% confidence interval 0.10 to 2.44;  $I^2=0\%$ ,  $n=2$  RCT). Including data from

1  
2  
3  
4 observational studies had little influence on the overall result (41 of 3433 versus 146 of  
5  
6 4625; relative risk 0.83; 95% confidence interval 0.5 to 1.20;  $I^2=0\%$ ; Egger's test  $P=0.248$ ).

7  
8 There was no difference between subgroups of trials stratified by design (test for subgroup  
9  
10 differences  $P=0.481$ ).

11  
12  
13  
14  
15  
16  
17  
18  
19  
20  
21  
22  
23  
24  
25  
26  
27  
28  
29  
30  
31  
32  
33  
34  
35  
36  
37  
38  
39  
40  
41  
42  
43  
44  
45  
46  
47  
48  
49  
50  
51  
52  
53  
54  
55  
56  
57  
58  
59  
60

For peer review only

## DISCUSSION

This systematic review found that the evidence of the effect of antiviral therapy on clinical outcomes is weak. RCTs found no benefit of treatment on HCC, mortality or HCC related mortality in HBV. The total number of patients and duration of follow up may be too small to determine clinical effects. The inclusion of observational studies did not strengthen the overall findings because there was clear evidence of bias suggesting that the study design was closely related to the estimated treatment effects. The prospective cohort studies found that antiviral therapy increased the risk of HCC and had no effect on mortality in HBV. The case control studies found that antiviral therapy reduced both HCC and mortality. These findings suggest that detection and ascertainment bias as well as confounding by indication had a considerable influence on the overall result, which may explain why previous meta-analyses have disagreed in their assessment of the benefit of antiviral therapy<sup>16-18 20 21 23 24</sup>.

The main limitation of our review is the limited number of RCTs. Only one of the included trials had prevention of HCC as a primary outcome measure<sup>27</sup> and none were designed to evaluate the effect on mortality or HCC related mortality. The current recommendation to treat patients with HBV is primarily based on surrogate outcomes. At present the evidence supporting the use of virological markers as surrogate outcomes is weak. The fact that some studies have found a correlation between a virological response and improved liver histology does not necessarily validate their use as surrogate outcomes. Previous evidence shows that interventions supported by surrogate markers may in fact have no benefit or even harmful effects on clinical outcome measures<sup>68</sup>. Still, our findings are not sufficiently convincing and do not allow for changes in clinical practice.

1  
2  
3  
4 Another limitation of the current review is our failure to extract data for analyses of  
5  
6 treatment responders versus non-responders. However, only six cases of HCC were  
7  
8 reportedly diagnosed in patients with biochemical or viral treatment response. This  
9  
10 suggests that treatment response does not lead to elimination of the HCC risk, but  
11  
12 probably decreases HCC incidence compared to non- or partial-responders. This would be  
13  
14 in line with previous findings<sup>19 25</sup>. The majority of included trials in the current review  
15  
16 assessed first generation NA and interferon, as reflected in low response rates. It was  
17  
18 however not within the scope of the review to investigate modern antiviral treatments, as  
19  
20 we included untreated control groups. Newer treatments will likely result in more patients  
21  
22 achieving sustained suppression of HBV-DNA. It is therefore possible that the current  
23  
24 review underestimates a potential treatment effect. It would also have been of interest had  
25  
26 we been able to adjust for other common risk factors for HCC such as non-alcoholic  
27  
28 steatohepatitis, alcoholic liver disease and coinfection with hepatitis C, hepatitis D and  
29  
30 human immunodeficiency virus. Although these data were extracted, there was not  
31  
32 enough data to allow for analyses.  
33  
34  
35  
36

37  
38 There are several potential explanations for the discrepancies between RCTs and  
39  
40 observational studies<sup>69</sup>. The fact that only prospective cohort studies found an increased  
41  
42 risk of HCC among patients receiving antiviral therapy opposes speculations that the  
43  
44 treatment affected HCC development. The findings are more likely to reflect baseline  
45  
46 differences in the viral load, genotype and degree of liver disease. The degree of  
47  
48 monitoring in the treatment and control group is also likely to differ and may lead to  
49  
50 detection bias. The importance of detection bias is further supported by the subgroup  
51  
52 differences observed according to HCC screening. The case control studies are likely to  
53  
54  
55  
56  
57  
58  
59  
60



1  
2  
3  
4 have an even higher risk of bias, as confounding by indication and ascertainment bias is  
5  
6 likely to exist in retrospective studies. Reporting bias should also be considered<sup>33</sup>.  
7  
8

9  
10 The subgroup differences with regards to type of intervention suggests a possible anti-  
11  
12 carcinogenic effect of interferon, as seen in HCV<sup>70</sup>. We additionally found a decrease in  
13  
14 both HCC incidence and overall mortality in sensitivity analyses of patients with cirrhosis.  
15  
16 This could support the case for continued treatment of patients with cirrhosis.  
17  
18

19  
20 We found a beneficial effect of interferon and/or NA on mortality in HBV when including  
21  
22 RCTs and observational studies in chronic HBV patients. The assessment of mortality is  
23  
24 robust to bias<sup>71</sup>. Accordingly, our subgroup analysis showed no clear relation between the  
25  
26 results and the study design. HCC mortality is more prone to bias. Whether antiviral  
27  
28 treatment for HBV decreases mortality except from HCC is unknown.  
29  
30

31  
32 In conclusion, antiviral treatment for HBV has no proven effect on the clinical outcomes  
33  
34 HCC and mortality. Bias has a paramount impact on treatment effect estimates in  
35  
36 observational studies and we recommend a critical approach to conclusions drawn in such  
37  
38 studies. Future trials on antiviral treatment for HBV should be designed to show an effect  
39  
40 on clinical endpoints rather than surrogate markers.  
41  
42  
43  
44  
45

46  
47 **Contributors:** MT, LLG and AK conceived the idea and design. MT and EKD collected  
48  
49 and assembled data. MT, LLG and AK analysed and interpreted the data. MT and LLG  
50  
51 drafted the manuscript. LLG and AK revised the manuscript for important intellectual  
52  
53 content. All authors discussed and approved of the final version of the manuscript. MT is  
54  
55 guarantor.  
56  
57  
58  
59  
60

1  
2  
3  
4 **Competing interests:** All authors have completed the ICMJE uniform disclosure form at  
5  
6 [www.icmje.org/coi\\_disclosure.pdf](http://www.icmje.org/coi_disclosure.pdf) (available on request from the corresponding author)  
7  
8 and declare: no support from any organisation for the submitted work; no financial  
9  
10 relationships with any organisations that might have an interest in the submitted work in  
11  
12 the previous three years; no other relationships or activities that could appear to have  
13  
14 influenced the submitted work.  
15

16  
17  
18 **Ethical approval:** Not required.  
19

20  
21 **Data sharing:** Dataset available from the corresponding author.  
22  
23

24  
25 **Licence statement:** Corresponding Author has the right to grant on behalf of all authors  
26  
27 and does grant on behalf of all authors, an exclusive licence (or non exclusive for  
28  
29 government employees) on a worldwide basis to the BMJ Publishing Group Ltd to permit  
30  
31 this article (if accepted) to be published in BMJ editions and any other BMJ PGL products  
32  
33 and sublicences such use and exploit all subsidiary rights, as set out in our licence.  
34  
35  
36  
37  
38  
39  
40  
41  
42  
43  
44  
45  
46  
47  
48  
49  
50  
51  
52  
53  
54  
55  
56  
57  
58  
59  
60

## FIGURE LEGENDS

1  
2  
3  
4  
5  
6  
7 *Figure 1. Study flow diagram.*  
8  
9

10 *Figure 2. Random effects inverse variance meta-analysis of antiviral therapy*  
11 *treatment effect on hepatocellular carcinoma in patients with chronic hepatitis B,*  
12 *subgroups according to trial design.*  
13  
14  
15  
16

17 *Figure 3. Random effects inverse variance meta-analysis of antiviral therapy*  
18 *treatment effect on hepatocellular carcinoma in patients with chronic hepatitis B*  
19 *and cirrhosis, subgroups according to trial design.*  
20  
21  
22  
23  
24

25 *Figure 4. Random effects inverse variance meta-analysis of antiviral therapy*  
26 *treatment effect on mortality in patients with chronic hepatitis B, subgroups*  
27 *according to trial design.*  
28  
29  
30  
31  
32  
33  
34  
35  
36  
37  
38  
39  
40  
41  
42  
43  
44  
45  
46  
47  
48  
49  
50  
51  
52  
53  
54  
55  
56  
57  
58  
59  
60

## REFERENCES

1. WHO. Position Paper: Hepatitis B. *WHO Weekly Epidemiological Report: World Health Organization*, 2009.
2. Perz JF, Armstrong GL, Farrington LA, Hutin YJF, Bell BP. The contributions of hepatitis B virus and hepatitis C virus infections to cirrhosis and primary liver cancer worldwide. *J Hepatol* 2006;45(4):529-38.
3. WHO. Hepatitis C Fact Sheet.  
<http://www.who.int/mediacentre/factsheets/fs164/en/index.html>; World Health Organization, 2012.
4. Ferlay J, Shin HR, Bray F, Forman D, Mathers C, Parkin DM. GLOBOCAN 2008 v2.0, Cancer Incidence and Mortality Worldwide: IARC CancerBase No. 10. Lyon, France: International Agency for Research on Cancer, 2010.
5. El-Serag HB. Hepatocellular carcinoma. *N Engl J Med* 2011;365(12):1118-27.
6. El-Serag HB. Epidemiology of Viral Hepatitis and Hepatocellular Carcinoma. *Gastroenterology* 2012;142(6):1264-73.e1.
7. Ni Y-H, Chang M-H, Wu J-F, Hsu H-Y, Chen H-L, Chen D-S. Minimization of hepatitis B infection by a 25-year universal vaccination program. *Journal of Hepatology* 2012;57(4):730-35.
8. Ott JJ, Stevens GA, Groeger J, Wiersma ST. Global epidemiology of hepatitis B virus infection: New estimates of age-specific HBsAg seroprevalence and endemicity. *Vaccine* 2012;30(12):2212-19.
9. Ly KN, Jian X, Klevens RM, Jiles RB, Ward JW, Holmberg SD. The Increasing Burden of Mortality From Viral Hepatitis in the United States Between 1999 and 2007. *Annals of Internal Medicine* 2012;156(4):271-W-52.
10. Fattovich G, Bortolotti F, Donato F. Natural history of chronic hepatitis B: Special emphasis on disease progression and prognostic factors. *Journal of Hepatology* 2008;48(2):335-52.
11. Chen CJ, Yang HI, Iloeje UH, The R-HBVS G. Hepatitis B virus DNA levels and outcomes in chronic hepatitis B. *Hepatology* 2009;49(S5):S72-S84.
12. Liaw YF. Hepatitis B virus replication and liver disease progression: the impact of antiviral therapy. *Antiviral therapy* 2006;11(6):669-79.

- 1  
2  
3  
4 13. Lok AS. Does antiviral therapy for hepatitis B and C prevent hepatocellular carcinoma?  
5 *J Gastroenterol Hepatol* 2011;26(2):221-7.  
6  
7  
8 14. EASL. EASL Clinical Practice Guidelines: Management of chronic hepatitis B virus  
9 infection. *J Hepatol* 2012.  
10  
11 15. Shamliyan TA, MacDonald R, Shaikat A, Taylor BC, Yuan J-M, Johnson JR, et al.  
12 Antiviral Therapy for Adults With Chronic Hepatitis B: A Systematic Review for a National  
13 Institutes of Health Consensus Development Conference. *Annals of Internal Medicine*  
14 2009;150(2):111-24.  
15  
16  
17 16. Yang YF, Zhao W, Zhong YD, Xia HM, Shen L, Zhang N. Interferon therapy in chronic  
18 hepatitis B reduces progression to cirrhosis and hepatocellular carcinoma: a meta-  
19 analysis. *Journal of viral hepatitis* 2009;16(4):265-71.  
20  
21  
22 17. Sung JJY, Tsoi KKF, Wong VWS, Li KCT, Chan HLY. Meta-analysis: treatment of  
23 hepatitis B infection reduces risk of hepatocellular carcinoma. *Alimentary Pharmacology &*  
24 *Therapeutics* 2008;28(9):1067-77.  
25  
26  
27 18. Shen YC, Hsu C, Cheng CC, Hu FC, Cheng AL. A Critical Evaluation of the Preventive  
28 Effect of Antiviral Therapy on the Development of Hepatocellular Carcinoma in Patients  
29 with Chronic Hepatitis C or B: A Novel Approach by Using Meta-Regression. *Oncology*  
30 2012;82(5):275-89.  
31  
32  
33 19. Papatheodoridis GV, Lampertico P, Manolakopoulos S, Lok A. Incidence of  
34 hepatocellular carcinoma in chronic hepatitis B patients receiving nucleos(t)ide therapy: a  
35 systematic review. *J Hepatol* 2010;53(2):348-56.  
36  
37  
38 20. Miyake Y, Kobashi H, Yamamoto K. Meta-analysis: the effect of interferon on  
39 development of hepatocellular carcinoma in patients with chronic hepatitis B virus  
40 infection. *Journal of gastroenterology* 2009;44(5):470-5.  
41  
42  
43 21. Zhang C-H, Xu G-L, Jia W-D, Li J-S, Ma J-L, Ge Y-S. Effects of interferon treatment on  
44 development and progression of hepatocellular carcinoma in patients with chronic virus  
45 infection: A meta-analysis of randomized controlled trials. *International Journal of Cancer*  
46 2011;129(5):1254-64.  
47  
48  
49 22. Singal AK, Fontana RJ. Meta-analysis: oral anti-viral agents in adults with  
50 decompensated hepatitis B virus cirrhosis. *Alimentary Pharmacology & Therapeutics*  
51 2012;35(6):674-89.  
52  
53  
54 23. Cammà C, Giunta M, Andreone P, Craxì A. Interferon and prevention of hepatocellular  
55 carcinoma in viral cirrhosis: an evidence-based approach. *Journal of Hepatology*  
56 2001;34(4):593-602.  
57  
58  
59  
60

- 1  
2  
3  
4 24. Baffis V, Shrier I. Use of Interferon for Prevention of Hepatocellular Carcinoma in  
5 Cirrhotic Patients with Hepatitis B or Hepatitis C Virus Infection. *Annals of Internal*  
6 *Medicine* 1999;131(9):696-701.  
7  
8  
9 25. Wong GLH, Yiu KKL, Wong VWS, Tsoi KKF, Chan HLY. Meta-analysis: reduction in  
10 hepatic events following interferon-alfa therapy of chronic hepatitis B. *Alimentary*  
11 *Pharmacology & Therapeutics* 2010;32(9):1059-68.  
12  
13 26. Manolakopoulos S, Karatapanis S, Elefsiniotis J, Mathou N, Vlachogiannakos J,  
14 Iliadou E, et al. Clinical course of lamivudine monotherapy in patients with decompensated  
15 cirrhosis due to HBeAg negative chronic HBV infection. *Am J Gastroenterol* 2004;99(1):57-  
16 63.  
17  
18  
19 27. Liaw Y-F, Sung JJY, Chow WC, Farrell G, Lee C-Z, Yuen H, et al. Lamivudine for  
20 Patients with Chronic Hepatitis B and Advanced Liver Disease. *New England Journal of*  
21 *Medicine* 2004;351(15):1521-31.  
22  
23  
24 28. Krogsgaard K, the Long-term Follow-up Investigator G, Executive Team on Anti-Viral  
25 T. The long-term effect of treatment with interferon- $\alpha$ 2a in chronic hepatitis B. *Journal of*  
26 *viral hepatitis* 1998;5(6):389-97.  
27  
28  
29 29. Higgins JP, Green S, (editors), editors. *Cochrane Handbook for Systematic Reviews of*  
30 *Interventions. Version 5.1.0 [updated March 2011]:* The Cochrane Collaboration,  
31 Cochrane Handbook for Systematic Reviews of Interventions. Version 5.1.0 [updated  
32 March 2011], 2011.  
33  
34  
35 30. Stroup DF, Berlin JA, Morton SC, Olkin I, Williamson GD, Rennie D, et al. Meta-  
36 analysis of observational studies in epidemiology: a proposal for reporting. Meta-analysis  
37 Of Observational Studies in Epidemiology (MOOSE) group. *JAMA : the journal of the*  
38 *American Medical Association* 2000;283(15):2008-12.  
39  
40  
41 31. EASL, EORCT. EASL-EORTC clinical practice guidelines: management of  
42 hepatocellular carcinoma. *J Hepatol* 2012;56(4):908-43.  
43  
44  
45 32. Colli A, Fraquelli M, Casazza G, Massironi S, Colucci A, Conte D, et al. Accuracy of  
46 ultrasonography, spiral CT, magnetic resonance, and alpha-fetoprotein in diagnosing  
47 hepatocellular carcinoma: a systematic review. *Am J Gastroenterol* 2006;101(3):513-23.  
48  
49  
50 33. Higgins J, Altman D, Sterne J, editors. *Chapter 8: Assessing risk of bias in included*  
51 *studies.:* The Cochrane Collaboration, Cochrane Handbook for Systematic Reviews of  
52 Interventions. Version 5.1.0 [updated March 2011], 2011.  
53  
54  
55  
56  
57  
58  
59  
60

- 1  
2  
3  
4 34. Wetterslev J, Thorlund K, Brok J, Gluud C. Trial sequential analysis may establish  
5 when firm evidence is reached in cumulative meta-analysis. *J Clin Epidemiol*  
6 2008;61(1):64-75.  
7  
8  
9 35. Anderson MG, Harrison TJ, Alexander G, Zuckerman AJ, Murray-Lyon IM.  
10 Randomised controlled trial of lymphoblastoid interferon for chronic active hepatitis B. *Gut*  
11 1987;28(5):619-22.  
12  
13 36. Benvegnù L, Chemello L, Noventa F, Fattovich G, Pontisso P, Alberti A. Retrospective  
14 analysis of the effect of interferon therapy on the clinical outcome of patients with viral  
15 cirrhosis. *Cancer* 1998;83(5):901-09.  
16  
17  
18 37. Bolukbas C, Bolukbas FF, Kendir T, Akbayir N, Ince AT, Abut E, et al. The  
19 effectiveness of lamivudine treatment in cirrhotic patients with HBV precore mutations: a  
20 prospective, open-label study. *Dig Dis Sci* 2006;51(7):1196-202.  
21  
22  
23 38. Brunetto MR, Oliveri F, Coco B, Leandro G, Colombatto P, Gorin JM, et al. Outcome of  
24 anti-HBe positive chronic hepatitis B in alpha-interferon treated and untreated patients: a  
25 long term cohort study. *Journal of Hepatology* 2002;36(2):263-70.  
26  
27  
28 39. Chan HL, Wang H, Niu J, Chim AM, Sung JJ. Two-year lamivudine treatment for  
29 hepatitis B e antigen-negative chronic hepatitis B: a double-blind, placebo-controlled trial.  
30 *Antiviral therapy* 2007;12(3):345-53.  
31  
32  
33 40. Chan SL, Mo FKF, Wong VWS, Liem GS, Wong GLH, Chan VTC, et al. Use of  
34 antiviral therapy in surveillance: impact on outcome of hepatitis B-related hepatocellular  
35 carcinoma. *Liver International* 2012;32(2):271-78.  
36  
37  
38 41. Das K, Das K, Datta S, Pal S, Hembram JR, Dhali GK, et al. Course of disease and  
39 survival after onset of decompensation in hepatitis B virus-related cirrhosis. *Liver*  
40 *International* 2010;30(7):1033-42.  
41  
42  
43 42. Di Marco V, Iacono OL, Cammà C, Vaccaro A, Giunta M, Martorana G, et al. The long-  
44 term course of chronic hepatitis B. *Hepatology* 1999;30(1):257-64.  
45  
46  
47 43. Farci P, Roskams T, Chessa L, Peddis G, Mazzoleni AP, Scioscia R, et al. Long-term  
48 benefit of interferon  $\alpha$  therapy of chronic hepatitis D: regression of advanced hepatic  
49 fibrosis. *Gastroenterology* 2004;126(7):1740-49.  
50  
51  
52 44. Fattovich G, Giustina G, Realdi G, Corrocher R, Schalm SW. Long-term outcome of  
53 hepatitis B e antigen-positive patients with compensated cirrhosis treated with interferon  
54 alfa. *Hepatology* 1997;26(5):1338-42.  
55  
56  
57 45. IIHCSG. Effect of interferon- $\alpha$  on progression of cirrhosis to hepatocellular carcinoma:  
58 a retrospective cohort study. *The Lancet* 1998;351(9115):1535-39.  
59  
60



- 1  
2  
3  
4 46. Ikeda K, Saitoh S, Suzuki Y, Kobayashi M, Tsubota A, Fukuda M, et al. Interferon  
5 decreases hepatocellular carcinogenesis in patients with cirrhosis caused by the hepatitis  
6 B virus. *Cancer* 1998;82(5):827-35.  
7  
8  
9 47. Lin CC, Wu JC, Chang TT, Huang YH, Wang YJ, Tsay SH, et al. Long-term evaluation  
10 of recombinant interferon  $\alpha$ 2b in the treatment of patients with hepatitis B e antigen-  
11 negative chronic hepatitis B in Taiwan. *Journal of viral hepatitis* 2001;8(6):438-46.  
12  
13 48. Lin SM, Yu ML, Lee CM, Chien RN, Sheen IS, Chu CM, et al. Interferon therapy in  
14 HBeAg positive chronic hepatitis reduces progression to cirrhosis and hepatocellular  
15 carcinoma. *J Hepatol* 2007;46(1):45-52.  
16  
17 49. Ma H, Wei L, Guo F, Zhu S, Sun Y, Wang H. Clinical features and survival in Chinese  
18 patients with hepatitis B e antigen-negative hepatitis B virus-related cirrhosis. *Journal of*  
19 *Gastroenterology and Hepatology* 2008;23(8pt1):1250-58.  
20  
21 50. Mahmood S, Niiyama G, Kamei A, Izumi A, Nakata K, Ikeda H, et al. Influence of viral  
22 load and genotype in the progression of Hepatitis B-associated liver cirrhosis to  
23 hepatocellular carcinoma. *Liver international : official journal of the International*  
24 *Association for the Study of the Liver* 2005;25(2):220-5.  
25  
26 51. Matsumoto A, Tanaka E, Rokuhara A, Kiyosawa K, Kumada H, Omata M, et al.  
27 Efficacy of lamivudine for preventing hepatocellular carcinoma in chronic hepatitis B: A  
28 multicenter retrospective study of 2795 patients. *Hepatology Research* 2005;32(3):173-84.  
29  
30 52. Mazzella G, Accogli E, Sottili S, Festi D, Orsini M, Salzetta A, et al. Alpha interferon  
31 treatment may prevent hepatocellular carcinoma in HCV-related liver cirrhosis. *J Hepatol*  
32 1996;24(2):141-47.  
33  
34 53. Mazzella G, Saracco G, Festi D, Rosina F, Marchetto S, Jaboli F, et al. Long-term  
35 results with interferon therapy in chronic type B hepatitis: a prospective randomized trial.  
36 *Am J Gastroenterol* 1999;94(8):2246-50.  
37  
38 54. Niederau C, Heintges T, Lange S, Goldmann G, Niederau CM, Mohr L, et al. Long-  
39 Term Follow-up of HBeAg-Positive Patients Treated with Interferon Alfa for Chronic  
40 Hepatitis B. *New England Journal of Medicine* 1996;334(22):1422-27.  
41  
42 55. Papatheodoridis GV, Manesis E, Hadziyannis SJ. The long-term outcome of interferon-  
43 alpha treated and untreated patients with HBeAg-negative chronic hepatitis B. *J Hepatol*  
44 2001;34(2):306-13.  
45  
46 56. Robson SC, Brice E, van Rensburg C, Kannemeyer J, Hift RJ, Kirsch RE. Safety and  
47 efficacy of interferon alpha-2b following prednisone withdrawal in the treatment of chronic  
48  
49  
50  
51  
52  
53  
54  
55  
56  
57  
58  
59  
60



1  
2  
3  
4 viral hepatitis B. A case-controlled, randomised study. *South African medical journal =*  
5 *Suid-Afrikaanse tydskrif vir geneeskunde* 1992;82(5):317-20.

7  
8 57. Romeo R, Del Ninno E, Rumi M, Russo A, Sangiovanni A, de Franchis R, et al. A 28-  
9 Year Study of the Course of Hepatitis  $\Delta$  Infection: A Risk Factor for Cirrhosis and  
10 Hepatocellular Carcinoma. *Gastroenterology* 2009;136(5):1629-38.

11  
12 58. Tangkijvanich P, Thong-ngam D, Mahachai V, Kladchareon N, Suwangool P,  
13 Kullavanijaya P. Long-term effect of interferon therapy on incidence of cirrhosis and  
14 hepatocellular carcinoma in Thai patients with chronic hepatitis B. *The Southeast Asian*  
15 *journal of tropical medicine and public health* 2001;32(3):452-8.

16  
17 59. Tong MJ, Blatt LM, Tyson KB, Kao VWC. Death from liver disease and development of  
18 hepatocellular carcinoma in patients with chronic hepatitis B virus infection: a prospective  
19 study. *Gastroenterol Hepatol* 2006;2:41-47.

20  
21 60. Tong MJ, Hsien C, Song JJ, Kao JH, Sun HE, Hsu L, et al. Factors associated with  
22 progression to hepatocellular carcinoma and to death from liver complications in patients  
23 with HBsAg-positive cirrhosis. *Dig Dis Sci* 2009;54(6):1337-46.

24  
25 61. Truong BX, Seo Y, Kato M, Hamano K, Ninomiya T, Katayama M, et al. Long-term  
26 follow-up of Japanese patients with chronic hepatitis B treated with interferon-alpha.  
27 *International journal of molecular medicine* 2005;16(2):279-84.

28  
29 62. Waked I, Amin M, Abd el Fattah S, Osman LM, Sabbour MS. Experience with  
30 interferon in chronic hepatitis B in Egypt. *J Chemother* 1990;2(5):310-8.

31  
32 63. Wong VW-S, Chan SL, Mo F, Chan T-C, Loong HH-F, Wong GL-H, et al. Clinical  
33 Scoring System to Predict Hepatocellular Carcinoma in Chronic Hepatitis B Carriers.  
34 *Journal of Clinical Oncology* 2010;28(10):1660-65.

35  
36 64. Yuen M-F, Hui C-K, Cheng C-C, Wu C-H, Lai Y-P, Lai C-L. Long-term follow-up of  
37 interferon alfa treatment in chinese patients with chronic hepatitis B infection: The effect on  
38 hepatitis B e antigen seroconversion and the development of cirrhosis-related  
39 complications. *Hepatology* 2001;34(1):139-45.

40  
41 65. Yuen M-F, Wong DK-H, Sablon E, Tse E, Ng IO-L, Yuan H-J, et al. HBsAg  
42 seroclearance in chronic hepatitis B in the Chinese: Virological, histological, and clinical  
43 aspects. *Hepatology* 2004;39(6):1694-701.

44  
45 66. Yuen MF, Seto WK, Chow DH, Tsui K, Wong DK, Ngai VW, et al. Long-term  
46 lamivudine therapy reduces the risk of long-term complications of chronic hepatitis B  
47 infection even in patients without advanced disease. *Antiviral therapy* 2007;12(8):1295-  
48 303.

1  
2  
3  
4 67. Zampino R, Marrone A, Merola A, Trani B, Cirillo G, Karayiannis P, et al. Long-term  
5 outcome of hepatitis B and hepatitis C virus co-infection and single HBV infection acquired  
6 in youth. *Journal of medical virology* 2009;81(12):2012-20.  
7

8  
9 68. Psaty BM, Weiss NS, Furberg CD, Koepsell TD, Siscovick DS, Rosendaal FR, et al.  
10 Surrogate end points, health outcomes, and the drug-approval process for the treatment of  
11 risk factors for cardiovascular disease. *JAMA : the journal of the American Medical*  
12 *Association* 1999;282(8):786-90.  
13

14  
15 69. Odgaard-Jensen J, Vist GE, Timmer A, Kunz R, Akl EA, Schunemann H, et al.  
16 Randomisation to protect against selection bias in healthcare trials. *Cochrane Database*  
17 *Syst Rev* 2011(4):MR000012.  
18

19  
20 70. Kimer N, Dahl EK, Gluud LL, Krag A. Antiviral therapy for prevention of hepatocellular  
21 carcinoma in chronic hepatitis C: systematic review and meta-analysis of randomised  
22 controlled trials. *BMJ open* 2012;2(5).  
23

24  
25 71. Savovic J, Jones HE, Altman DG, Harris RJ, Juni P, Pildal J, et al. Influence of  
26 reported study design characteristics on intervention effect estimates from randomized,  
27 controlled trials. *Ann Intern Med* 2012;157(6):429-38.  
28  
29  
30  
31  
32  
33  
34  
35  
36  
37  
38  
39  
40  
41  
42  
43  
44  
45  
46  
47  
48  
49  
50  
51  
52  
53  
54  
55  
56  
57  
58  
59  
60

27.323 records identified through database searching

151 additional records identified through other sources

27.474 records screened

26.990 records excluded because they were either duplicates or clearly irrelevant

484 full-text articles assessed for eligibility

448 full-text articles excluded, with reasons:

- Turned out not to be prospective or case-cohort (85).
- Did not have an untreated control group (47).
- Did not have a treated control group (54).
- Did not report HCC incidence or mortality (88).
- Did not report outcome sorted for treatment groups (48).
- A more recent report was available (65).
- Outcome assessment was derived from central registries (40).
- Had a follow up period of less than 12 month (19).

36 articles referring to 35 studies included in qualitative synthesis

36 articles referring to 35 studies included in quantitative synthesis (meta-analysis)

For peer review only

1  
2  
3  
4  
5  
6  
7  
8  
9  
10  
11  
12  
13  
14  
15  
16  
17  
18  
19  
20  
21  
22  
23  
24  
25  
26  
27  
28  
29  
30  
31  
32  
33  
34  
35  
36  
37  
38  
39  
40  
41  
42  
43  
44  
45  
46  
47  
48  
49  
50

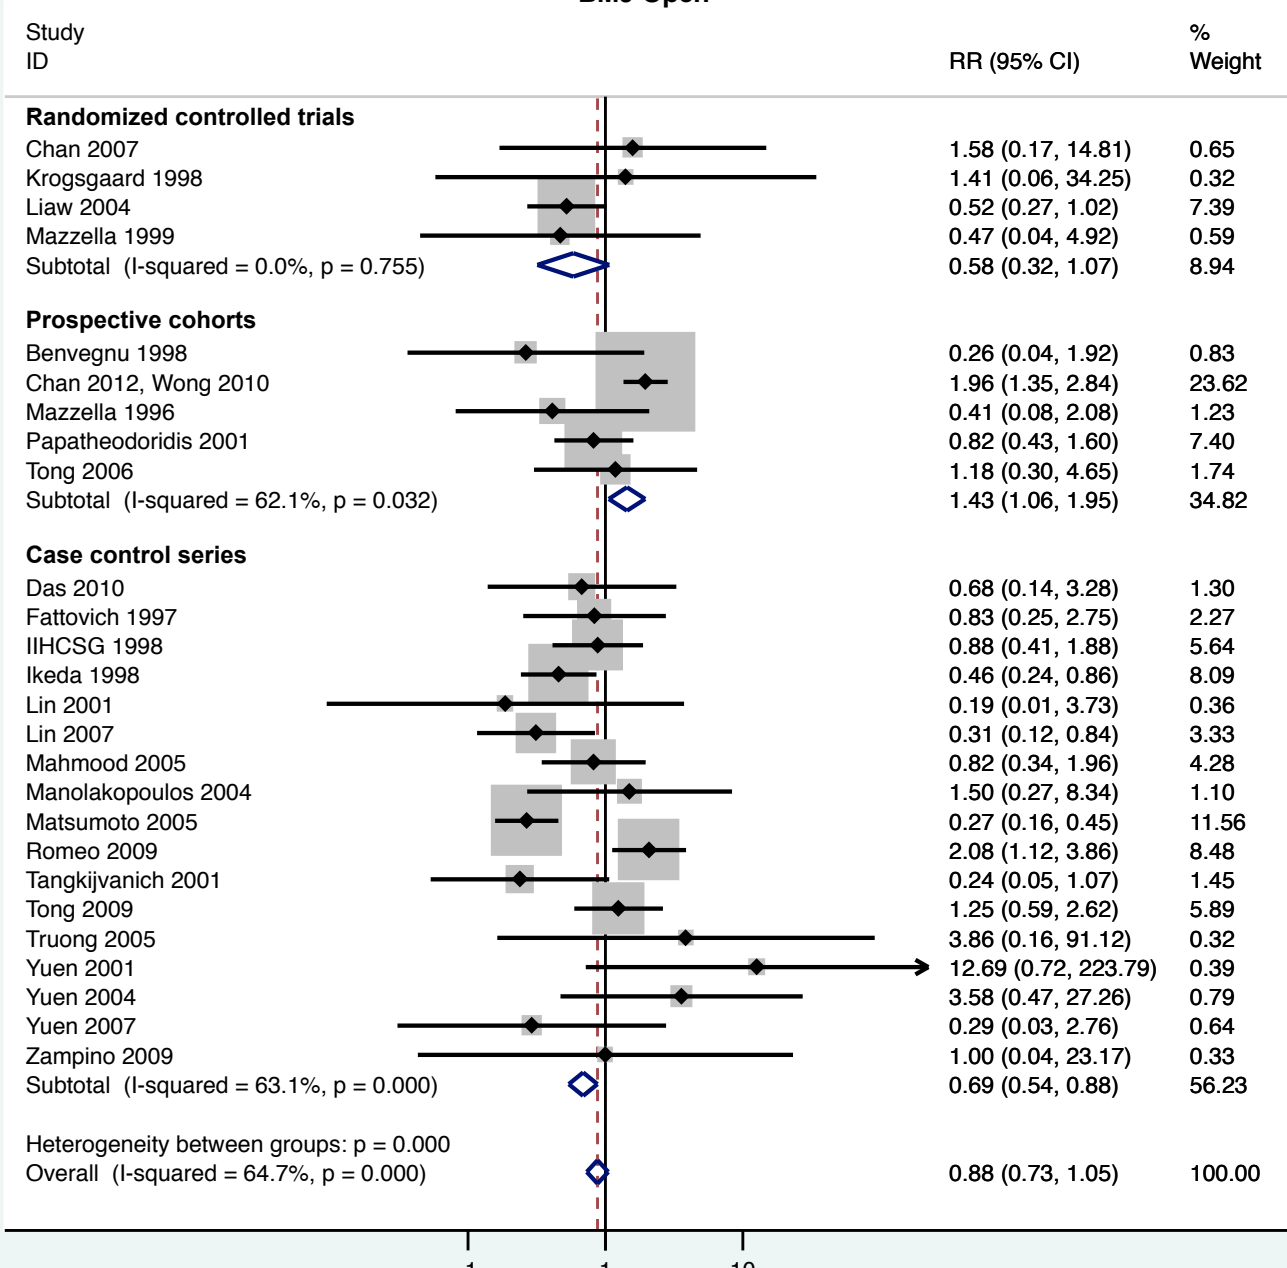

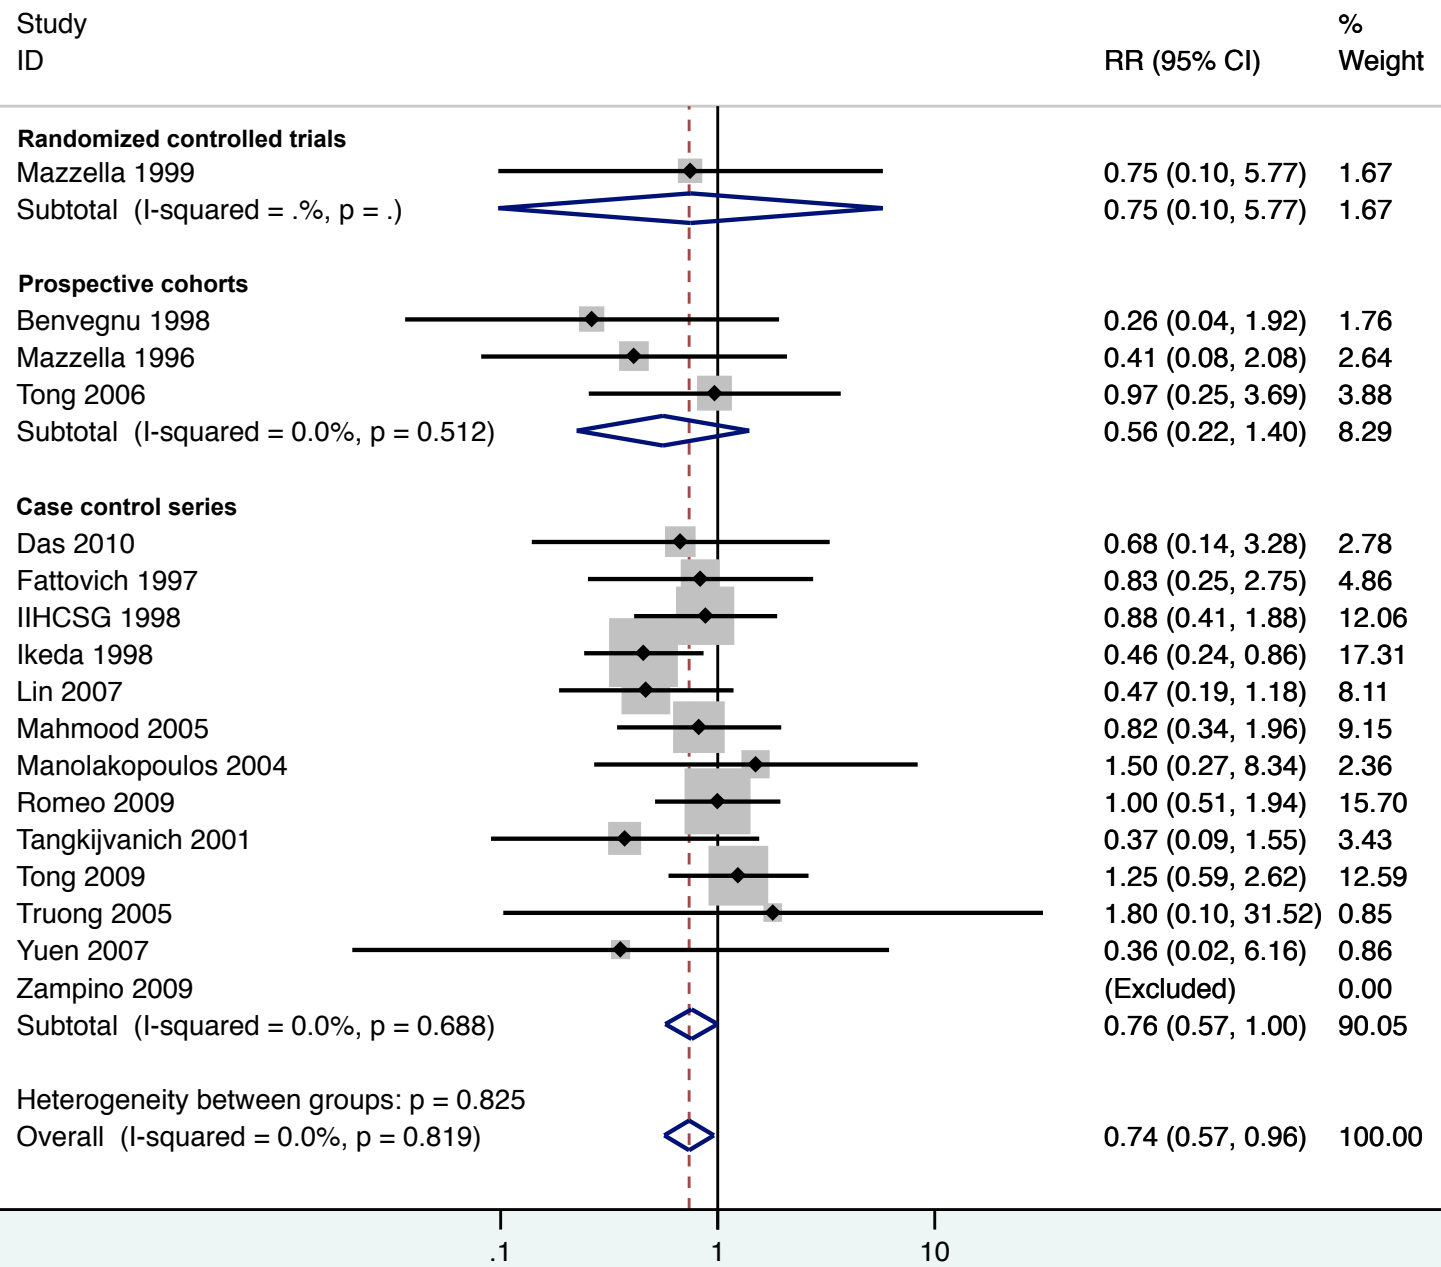

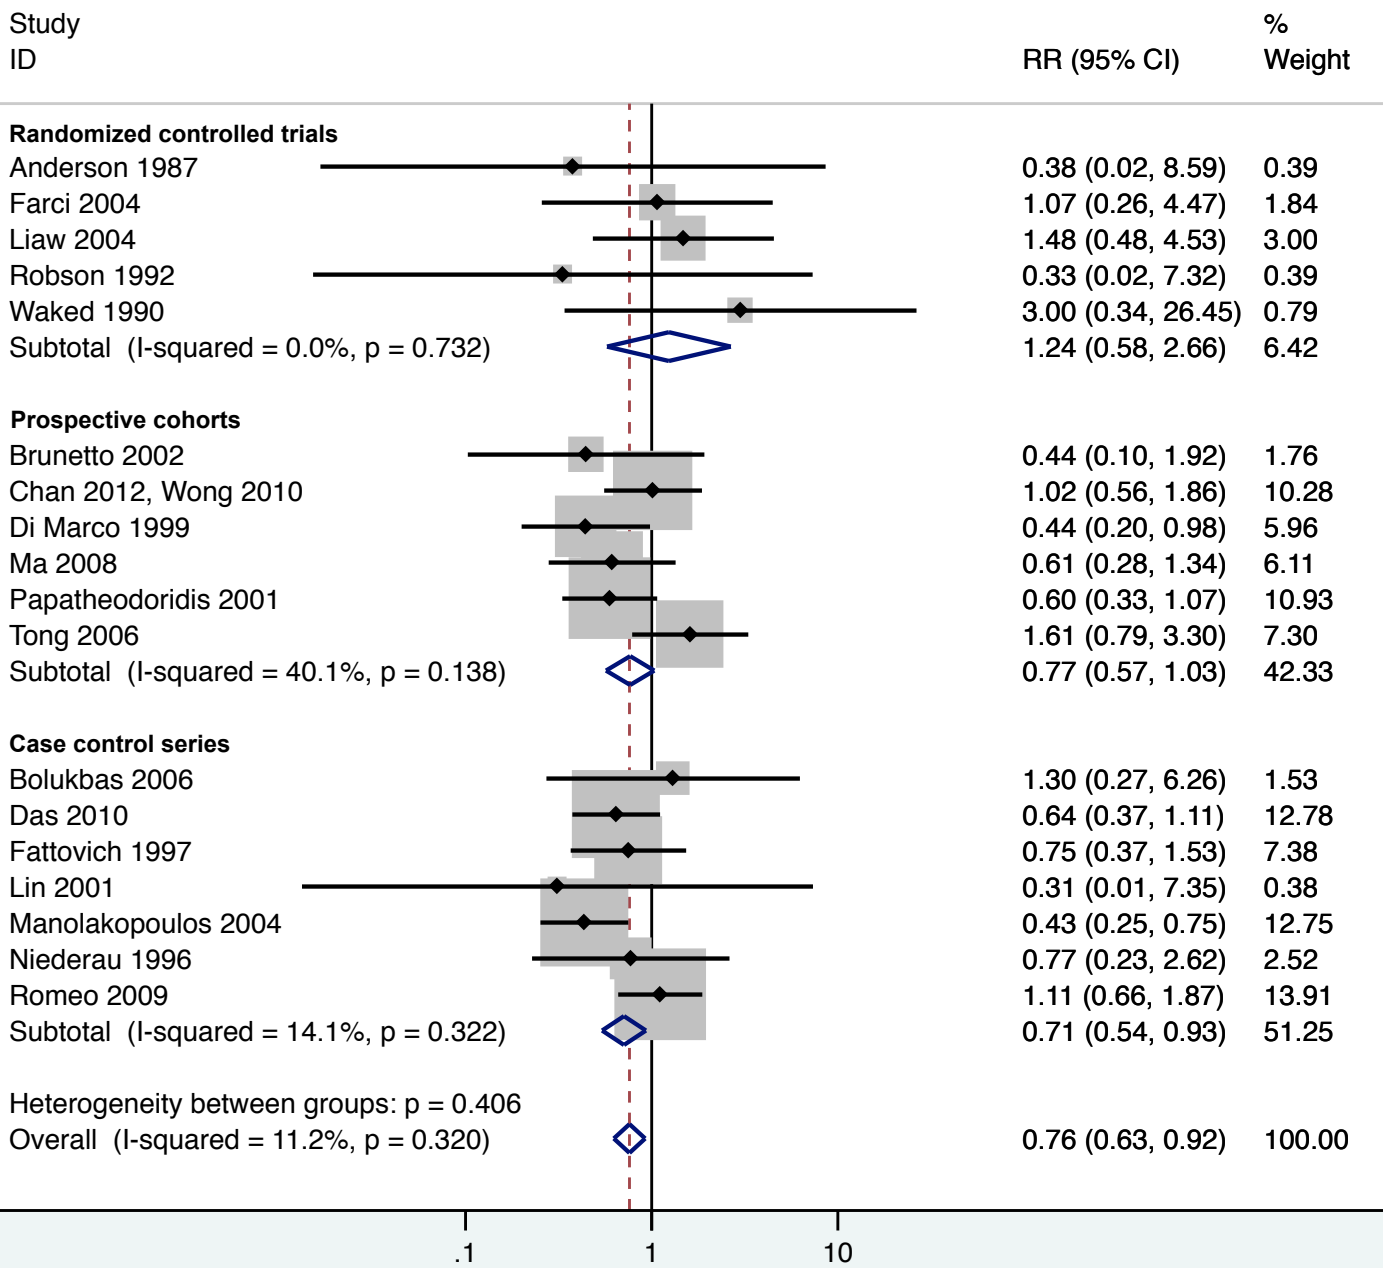

**Table 1. Characteristics of Trials**

| <b>Randomized controlled trials</b> |                          |                                                       |                           |                                     |                               |                                             |
|-------------------------------------|--------------------------|-------------------------------------------------------|---------------------------|-------------------------------------|-------------------------------|---------------------------------------------|
| <b>Study, year (reference)</b>      | <b>Country of origin</b> | <b>Intervention (dose)</b>                            | <b>Number of patients</b> | <b>Follow up (mean/median year)</b> | <b>HCC screening (yes/no)</b> | <b>Outcomes reported</b>                    |
| Anderson 1987 (35)                  | England                  | IFN (2.5-7.5 MU/m <sup>2</sup> /d)                    | I: 14<br>C: 16            | I: 1.0<br>C: 1.0                    | No                            | Overall mortality                           |
| Chan 2007 (39)                      | China                    | Lamivudine (100mg/d)                                  | I: 89<br>C: 47            | I: 2.5<br>C: 2.5                    | No                            | HCC incidence                               |
| Farci 2004 (43)                     | Italy                    | IFN (3-9 MU/x3w)                                      | I: 28<br>C: 10            | I: 10.8<br>C: 10.8                  | No                            | Overall mortality                           |
| Krogsgaard 1998 (28)                | Europe                   | IFN (1.5-18 MU/x3w)                                   | I: 210<br>C: 98           | I: 1.3<br>C: 1.3                    | No                            | HCC incidence and -mortality                |
| Liaw 2004 (27)                      | Asia                     | Lamivudine (100mg/d)                                  | I: 436<br>C: 215          | I: 2.7<br>C: 2.7                    | Yes                           | HCC incidence<br>Overall mortality          |
| Mazzella 1999 (53)                  | Italy                    | IFN (648MU total)                                     | I: 33<br>C: 31            | I: 7.2<br>C: 6.6                    | No                            | HCC incidence and -mortality                |
| Robson 1992 (56)                    | South Africa             | IFN (10MU/x3w)                                        | I: 10<br>C: 10            | I: 1.4<br>C: 1.4                    | No                            | Overall and HCC mortality                   |
| Waked 1990 (62)                     | Egypt                    | IFN (5MU/m <sup>2</sup> /x3w - 5MU/m <sup>2</sup> /d) | I: 20<br>C: 20            | I: 1.3<br>C: 1.3                    | No                            | Overall and HCC mortality                   |
| <b>Prospective cohorts</b>          |                          |                                                       |                           |                                     |                               |                                             |
| <b>Study, year (reference)</b>      | <b>Country of origin</b> | <b>Intervention (dose)</b>                            | <b>Number of patients</b> | <b>Follow up (mean/median year)</b> | <b>HCC screening (yes/no)</b> | <b>Outcomes reported</b>                    |
| Benvegna 1998 (36)                  | Italy                    | IFN (5-10 MU/x3w)                                     | I: 13<br>C: 24            | I: 6.0<br>C: 6.0                    | Yes                           | HCC incidence<br>Overall mortality          |
| Brunetto 2002 (38)                  | Italy                    | IFN (9MU/x3w)                                         | I: 103<br>C: 61           | I: 6.0<br>C: 6.0                    | Yes                           | Overall mortality                           |
| Chan 2012 (40)<br>Wong 2010 (63)    | China                    | Nucleos(t)ides<br>IFN (NS)                            | I: 158<br>C: 1271         | I: 10.1<br>C: 10.1                  | Yes                           | HCC incidence,<br>overall and HCC mortality |
| Di Marco 1999 (42)                  | Italy                    | IFN (NS)                                              | I: 109<br>C: 193          | I: 7.8<br>C: 7.8                    | Yes                           | Overall mortality                           |
| Ma 2008 (49)                        | China                    | Nucleos(t)ides (NS)                                   | I: 41<br>C: 176           | I: 2.9<br>C: 2.9                    | Yes                           | Overall mortality                           |
| Mazzella 1996 (52)                  | Italy                    | IFN (10MU/x3w)                                        | I: 34<br>C: 28            | I: 4.1<br>C: 4.0                    | Yes                           | HCC incidence                               |
| Papatheodoridis 2001 (55)           | Greece                   | IFN (3MU/x3w)                                         | I: 209<br>C: 152          | I: 6.0<br>C: 6.1                    | Yes                           | HCC incidence,<br>overall and HCC mortality |
| Tong 2006 (59)                      | USA                      | IFN (NS)                                              | I: 22<br>C: 378           | I: 7.0<br>C: 7.0                    | Yes                           | HCC incidence,<br>overall and HCC mortality |
| <b>Case control series</b>          |                          |                                                       |                           |                                     |                               |                                             |
| <b>Study, year (reference)</b>      | <b>Country of origin</b> | <b>Intervention (dose)</b>                            | <b>Number of patients</b> | <b>Follow up (mean/median year)</b> | <b>HCC screening (yes/no)</b> | <b>Outcomes reported</b>                    |
| Bolukbas 2006 (37)                  | Turkey                   | Lamivudine (100mg/d)                                  | I: 23<br>C: 15            | I: 1.5<br>C: 2.0                    | Yes                           | Overall and HCC mortality                   |
| Das 2010 (41)                       | India                    | Lamivudine<br>Adefovir (NS)                           | I: 151<br>C: 102          | I: 4.0<br>C: 3.8                    | Yes                           | HCC incidence,<br>overall and HCC mortality |
| Fattovich 1997 (44)                 | Europe                   | IFN (36MU to                                          | I: 40                     | I: 6.2                              | No                            | HCC incidence,                              |

|                                                                                                                                                                                                                                               |                  |                                     |                  |                    |     |                                          |
|-----------------------------------------------------------------------------------------------------------------------------------------------------------------------------------------------------------------------------------------------|------------------|-------------------------------------|------------------|--------------------|-----|------------------------------------------|
|                                                                                                                                                                                                                                               |                  | >300MU total)                       | C: 50            | C: 6.2             |     | overall and HCC mortality                |
| IHCSCG 1998 (45)                                                                                                                                                                                                                              | Italy, Argentina | IFN (9MU/w)                         | I: 49<br>C: 97   | I: 5.8<br>C: 6.9   | Yes | HCC incidence                            |
| Ikeda 1998 (46)                                                                                                                                                                                                                               | Japan            | IFN (6MU/x2w)                       | I: 94<br>C: 219  | I: 6.8<br>C: 7.0   | Yes | HCC incidence                            |
| Lin 2001 (47)                                                                                                                                                                                                                                 | China            | IFN (5MU/x3w)                       | I: 30<br>C: 28   | I: 2.7<br>C: 2.6   | No  | HCC incidence, overall and HCC mortality |
| Lin 2007 (48)                                                                                                                                                                                                                                 | China            | IFN (6-9 MU/m <sup>2</sup> /x3w)    | I: 233<br>C: 233 | I: 6.8<br>C: 6.1   | Yes | HCC incidence and -mortality             |
| Mahmood 2005 (50)                                                                                                                                                                                                                             | Japan            | IFN (6MU/d)                         | I: 23<br>C: 68   | I: 7.0<br>C: 7.0   | Yes | HCC incidence                            |
| Manolakopoulos 2004 (26)                                                                                                                                                                                                                      | Greece           | Lamivudine (100mg/d)                | I: 30<br>C: 30   | I: 1.5<br>C: 1.8   | Yes | HCC incidence, overall and HCC mortality |
| Matsumoto 2005 (51)                                                                                                                                                                                                                           | Japan            | Lamivudine (100mg/d)                | I: 508<br>C: 231 | I: 2.7<br>C: 5.3   | No  | HCC incidence                            |
| Niederrau 1996 (54)                                                                                                                                                                                                                           | Germany          | IFN (2-5 MU/x3w)                    | I: 103<br>C: 53  | I: 4.2<br>C: 3.2   | No  | Overall mortality                        |
| Romeo 2009 (57)                                                                                                                                                                                                                               | Italy            | Lamivudine (NS)<br>IFN (6-9 MU)     | I: 102<br>C: 135 | I: 22.4<br>C: 16.5 | Yes | HCC incidence, overall and HCC mortality |
| Tangkijvanich 2001 (58)                                                                                                                                                                                                                       | Thailand         | IFN (3-6 MU/x3w)                    | I: 67<br>C: 72   | I: 4.9<br>C: 4.9   | Yes | HCC incidence                            |
| Tong 2009 (60)                                                                                                                                                                                                                                | USA              | Lamivudine (NS)                     | I: 27<br>C: 101  | I: 5.3<br>C: 5.3   | Yes | HCC incidence and -mortality             |
| Truong 2005 (61)                                                                                                                                                                                                                              | Japan            | IFN (174-687 MU total)              | I: 27<br>C: 35   | I: 7.0<br>C: 6.2   | Yes | HCC incidence and -mortality             |
| Yuen 2001 (64)                                                                                                                                                                                                                                | China            | IFN (2.5-10 MU/m <sup>2</sup> /x3w) | I: 208<br>C: 203 | I: 8.9<br>C: 9.0   | Yes | HCC incidence and -mortality             |
| Yuen 2004 (65)                                                                                                                                                                                                                                | China            | IFN (NS)                            | I: 6<br>C: 86    | I: 10.5<br>C: 10.5 | No  | HCC incidence                            |
| Yuen 2007 (66)                                                                                                                                                                                                                                | China            | Lamivudine (100mg/d)                | I: 142<br>C: 124 | I: 7.5<br>C: 9.0   | Yes | HCC incidence                            |
| Zampino 2009 (67)                                                                                                                                                                                                                             | Italy            | IFN (5MU/m <sup>2</sup> /x3w)       | I: 41<br>C: 13   | I: 23<br>C: 23     | No  | HCC incidence                            |
| /x3w = thrice weekly; /d = daily; C = Control; CC = Case Control Series; HCC = hepatocellular carcinoma; I = Intervention; IFN = Interferon; MU = Million Units; NS = Not Stated; PC = Prospective Cohort; RCT = Randomized Controlled Trial. |                  |                                     |                  |                    |     |                                          |



Table 2. Patient Characteristics in Included Trials

**Randomized controlled trials**

| Study, year (reference) | Median/<br>Mean Age<br>(years) | Proportion<br>of men (%) | Proportion<br>with<br>cirrhosis<br>(%) | Proportion<br>with elevated<br>ALT (%) | Proportion<br>positive<br>for HBeAg<br>(%) | HBeAg<br>sero-<br>converters<br>(n,%) |
|-------------------------|--------------------------------|--------------------------|----------------------------------------|----------------------------------------|--------------------------------------------|---------------------------------------|
| Anderson 1987 (35)      | I: 36<br>C: 35                 | 100                      | 20                                     | 77                                     | 100                                        | I: 2; 14%<br>C: 0; 0%                 |
| Chan 2007 (39)          | I: 39<br>C: 39                 | 84                       | 16                                     | 77                                     | 5                                          | NS                                    |
| Farci 2004 (43)         | I: 35<br>C: 38                 | 83                       | 66                                     | 100                                    | 2                                          | I: NA<br>C: 1; 100%                   |
| Krogsgaard 1998 (28)    | I: 36<br>C: 36                 | 81                       | 19                                     | 100                                    | 100                                        | NS                                    |
| Liaw 2004 (27)          | I: 43<br>C: 44                 | 85                       | 33                                     | 78                                     | 58                                         | NS                                    |
| Mazzella 1999 (53)      | I: 36<br>C: 41                 | 78                       | 0                                      | 100                                    | 100                                        | I: 30; 91%<br>C: 19; 61%              |
| Robson 1992 (56)        | I: 33<br>C: 31                 | 70                       | NS                                     | 100                                    | 100                                        | I: 5; 50%<br>C: 1; 10%                |
| Waked 1990 (62)         | I: 35<br>C: 35                 | 78                       | 40                                     | 100                                    | 100                                        | I: 13; 81%<br>C: 5; 33%               |

**Prospective cohorts**

| Study, year (reference)          | Median/<br>Mean Age<br>(I/C; years) | Proportion<br>of men (%) | Proportion<br>with<br>cirrhosis<br>(%) | Proportion<br>with elevated<br>ALT (%) | Proportion<br>positive<br>for HBeAg<br>(%) | HBeAg<br>sero-<br>converters<br>(n,%) |
|----------------------------------|-------------------------------------|--------------------------|----------------------------------------|----------------------------------------|--------------------------------------------|---------------------------------------|
| Benvignu 1998 (36)               | I: 57<br>C: 60                      | 65                       | 100                                    | NS                                     | NS                                         | NS                                    |
| Brunetto 2002 (38)               | I: 40<br>C: 40                      | 80                       | 38                                     | NS                                     | 0                                          | NA                                    |
| Chan 2012 (40)<br>Wong 2010 (63) | NS                                  | 67                       | 32                                     | 87                                     | NS                                         | NS                                    |
| Di Marco 1999 (42)               | I: 33<br>C: 35                      | 71                       | 29                                     | 100                                    | 29                                         | I: 35; 32%<br>C: 29; 15%              |
| Ma 2008 (49)                     | I: 54<br>C: 54                      | 72                       | 100                                    | NS                                     | 24                                         | NS                                    |
| Mazzella 1996 (52)               | I: 48<br>C: 49                      | 73                       | 100                                    | NS                                     | NS                                         | NS                                    |
| Papatheodoridis 2001 (55)        | I: 47<br>C: 49                      | 83                       | 31                                     | 100                                    | 0                                          | NA                                    |
| Tong 2006 (59)                   | I: 48<br>C: 48                      | 71                       | 35                                     | NS                                     | 49                                         | NS                                    |

**Case control series**

| Study, year (reference) | Median/<br>Mean Age<br>(I/C; years) | Proportion<br>of men (%) | Proportion<br>with<br>cirrhosis<br>(%) | Proportion<br>with elevated<br>ALT (%) | Proportion<br>positive<br>for HBeAg<br>(%) | HBeAg<br>sero-<br>converters<br>(n,%) |
|-------------------------|-------------------------------------|--------------------------|----------------------------------------|----------------------------------------|--------------------------------------------|---------------------------------------|
| Bolukbas 2006 (37)      | I: 45<br>C: 46                      | 82                       | 100                                    | NS                                     | 0                                          | NA                                    |
| Das 2010 (41)           | I: 42<br>C: 46                      | 91                       | 100                                    | NS                                     | 45                                         | I: 12; 13%<br>C: 3; 10%               |

|    |                          |                |    |     |     |     |                           |
|----|--------------------------|----------------|----|-----|-----|-----|---------------------------|
| 1  | Fattovich 1997 (44)      | I: 47<br>C: 45 | 87 | 100 | 100 | 100 | I: 27; 68%<br>C: 30; 60%  |
| 2  |                          |                |    |     |     |     |                           |
| 3  | IIHCSG 1998 (45)         | I: 54<br>C: 54 | 64 | 100 | NS  | NS  | NS                        |
| 4  |                          |                |    |     |     |     |                           |
| 5  | Ikeda 1998 (46)          | I: 41<br>C: 44 | 79 | 100 | NS  | 52  | NS                        |
| 6  |                          |                |    |     |     |     |                           |
| 7  | Lin 2001 (47)            | I: 39<br>C: 41 | 95 | 10  | 100 | 0   | NA                        |
| 8  |                          |                |    |     |     |     |                           |
| 9  | Lin 2007 (48)            | I: 32<br>C: 31 | 94 | 9   | NS  | 100 | I: 115; 49%<br>C: 86; 37% |
| 10 |                          |                |    |     |     |     |                           |
| 11 | Mahmood 2005 (50)        | I: 49<br>C: 49 | 69 | 100 | NS  | 36  | NS                        |
| 12 |                          |                |    |     |     |     |                           |
| 13 | Manolakopoulos 2004 (26) | I: 65<br>C: 63 | 80 | 100 | 100 | 0   | NA                        |
| 14 |                          |                |    |     |     |     |                           |
| 15 | Matsumoto 2005 (51)      | I: 42<br>C: 41 | 73 | 18  | NS  | 55  | NS                        |
| 16 |                          |                |    |     |     |     |                           |
| 17 | Niederrau 1996 (54)      | I: 40<br>C: 41 | 78 | 28  | 100 | 100 | I: 53; 51%<br>C: 7; 13%   |
| 18 |                          |                |    |     |     |     |                           |
| 19 | Romeo 2009 (57)          | NS             | 77 | 35  | NS  | 27  | NS                        |
| 20 |                          |                |    |     |     |     |                           |
| 21 | Tangkijvanich 2001 (58)  | I: 37<br>C: 40 | 72 | 20  | NS  | 100 | I: 24; 36%<br>C: 7; 10%   |
| 22 |                          |                |    |     |     |     |                           |
| 23 | Tong 2009 (60)           | I: 46<br>C: 46 | 86 | 100 | 14  | 53  | NS                        |
| 24 |                          |                |    |     |     |     |                           |
| 25 | Truong 2005 (61)         | I: 33<br>C: 37 | 53 | 2   | 100 | 60  | I: 9; 53%<br>C: 11; 55%   |
| 26 |                          |                |    |     |     |     |                           |
| 27 | Yuen 2001 (64)           | I: 27<br>C: 28 | 64 | NS  | 32  | 100 | I: 96; 46%<br>C: 93; 46%  |
| 28 |                          |                |    |     |     |     |                           |
| 29 | Yuen 2004 (65)           | I: 43<br>C: 43 | 71 | NS  | NS  | 23  | NS                        |
| 30 |                          |                |    |     |     |     |                           |
| 31 | Yuen 2007 (66)           | I: 34<br>C: 33 | 74 | 0   | 48  | 100 | NS                        |
| 32 |                          |                |    |     |     |     |                           |
| 33 | Zampino 2009 (67)        | NS             | 67 | 0   | NS  | 54  | I: 16; 62%<br>C: NS       |
| 34 |                          |                |    |     |     |     |                           |
| 35 |                          |                |    |     |     |     |                           |
| 36 |                          |                |    |     |     |     |                           |
| 37 |                          |                |    |     |     |     |                           |
| 38 |                          |                |    |     |     |     |                           |
| 39 |                          |                |    |     |     |     |                           |
| 40 |                          |                |    |     |     |     |                           |
| 41 |                          |                |    |     |     |     |                           |
| 42 |                          |                |    |     |     |     |                           |
| 43 |                          |                |    |     |     |     |                           |
| 44 |                          |                |    |     |     |     |                           |
| 45 |                          |                |    |     |     |     |                           |
| 46 |                          |                |    |     |     |     |                           |
| 47 |                          |                |    |     |     |     |                           |
| 48 |                          |                |    |     |     |     |                           |
| 49 |                          |                |    |     |     |     |                           |
| 50 |                          |                |    |     |     |     |                           |
| 51 |                          |                |    |     |     |     |                           |
| 52 |                          |                |    |     |     |     |                           |
| 53 |                          |                |    |     |     |     |                           |
| 54 |                          |                |    |     |     |     |                           |
| 55 |                          |                |    |     |     |     |                           |
| 56 |                          |                |    |     |     |     |                           |
| 57 |                          |                |    |     |     |     |                           |
| 58 |                          |                |    |     |     |     |                           |
| 59 |                          |                |    |     |     |     |                           |
| 60 |                          |                |    |     |     |     |                           |

I = Intervention; C = Control; NA = Not Applicable; NS = Not Stated; ALT = Alanine amino transferase

Table 3. Risk of Bias Summary

| Study, year (reference) | Random sequence generation | Allocation concealment | Blinding of participants and personnel | Blinding of outcome assessment | Incomplete outcome data | Selective reporting |
|-------------------------|----------------------------|------------------------|----------------------------------------|--------------------------------|-------------------------|---------------------|
| Anderson 1987 (35)      | ?                          | ?                      | +                                      | +                              | ?                       | ?                   |
| Chan 2007 (39)          | +                          | +                      | +                                      | +                              | ?                       | ?                   |
| Farci 2004 (43)         | +                          | +                      | +                                      | +                              | ?                       | ?                   |
| Krogsgaard 1998 (28)    | ?                          | ?                      | +                                      | +                              | –                       | ?                   |
| Liaw 2004 (27)          | +                          | +                      | +                                      | +                              | +                       | +                   |
| Mazzella 1999 (53)      | ?                          | ?                      | +                                      | +                              | +                       | ?                   |
| Robson 1992 (56)        | ?                          | ?                      | +                                      | +                              | ?                       | ?                   |
| Waked 1990 (62)         | ?                          | ?                      | +                                      | +                              | ?                       | ?                   |

+ Low risk of bias. – High risk of bias. ? Unknown risk of bias.

## MOOSE Checklist

## ANTIVIRAL THERAPY FOR PREVENTION OF HEPATOCELLULAR CARCINOMA AND MORTALITY IN CHRONIC HEPATITIS B: SYSTEMATIC REVIEW AND META-ANALYSIS

Corresponding Author:  
Maja Thiele, M.D.

Abbreviations:  
HBV: Chronic Hepatitis B  
HCC: Hepatocellular carcinoma  
IFN: Interferons  
NA: Nucleos(t)ide analogues  
RR: Relative Risk

| Criteria                                           |                                                                               | Brief description of how the criteria were handled in the meta-analysis                                                                                                                                                                                   |
|----------------------------------------------------|-------------------------------------------------------------------------------|-----------------------------------------------------------------------------------------------------------------------------------------------------------------------------------------------------------------------------------------------------------|
| <b>Reporting of background should include</b>      |                                                                               |                                                                                                                                                                                                                                                           |
| √                                                  | Problem definition                                                            | Patients with HBV have an increased risk of HCC and death. It is debated whether antiviral treatment decreases incidence of HCC and mortality.                                                                                                            |
| √                                                  | Hypothesis statement                                                          | Antiviral treatment decreases the incidence of HCC and mortality in HBV.                                                                                                                                                                                  |
| √                                                  | Description of study outcomes                                                 | Primary outcomes: HCC and all-cause mortality.<br>Secondary outcomes: HCC related mortality.                                                                                                                                                              |
| √                                                  | Type of exposure or intervention used                                         | Exposure: Chronic hepatitis B. HBV was defined as sustained hepatitis B surface antigen (HBsAg) positivity for more than six months.<br>Interventions: IFN or NA without restrictions on duration or dose of therapy.<br>Control: No treatment or placebo |
| √                                                  | Type of study designs used                                                    | We included case control studies, prospective cohort studies and randomized trials..                                                                                                                                                                      |
| √                                                  | Study population                                                              | Patients with HBV were included.                                                                                                                                                                                                                          |
| <b>Reporting of search strategy should include</b> |                                                                               |                                                                                                                                                                                                                                                           |
| √                                                  | Qualifications of searches                                                    | The searches were performed in several electronic databases and combined with manual searches.                                                                                                                                                            |
| √                                                  | Search strategy, including time period included in the synthesis and keywords | No restriction on time period.<br>Keywords for HCC were: HCC, hepatoma, hepatocell*, liver cancer, liver neoplasm*, liver cell carcinoma.<br>Keywords for HBV were: HBV, CHB, hepatitis B, B                                                              |

|                                            |                                                                                                            |                                                                                                                                                                                                                                                                                                                                                                                                                                                                                                                                                                                                                                                                                                                         |
|--------------------------------------------|------------------------------------------------------------------------------------------------------------|-------------------------------------------------------------------------------------------------------------------------------------------------------------------------------------------------------------------------------------------------------------------------------------------------------------------------------------------------------------------------------------------------------------------------------------------------------------------------------------------------------------------------------------------------------------------------------------------------------------------------------------------------------------------------------------------------------------------------|
|                                            |                                                                                                            | hepatitis, dane particle, *HBs*, *HBe*, chronic hepatitis B, chronic B hepatitis.<br>Keywords for antiviral therapy were: IFN, interferon*, Placebo*, Lamivud*, Telbivud*, Emtricitab*, Entecavir, Adefovir, Tenofovir, Medical therapy, antiviral*, Drug Therapy, nucleoside*, nucleotide*                                                                                                                                                                                                                                                                                                                                                                                                                             |
| √                                          | Databases and registries searched                                                                          | PubMed, EMBASE, Science Citation Index Expanded, Cochrane Central Register of Controlled Trials                                                                                                                                                                                                                                                                                                                                                                                                                                                                                                                                                                                                                         |
| √                                          | Search software used, name and version, including special features                                         | EndNote was used to manage retrieved citations.                                                                                                                                                                                                                                                                                                                                                                                                                                                                                                                                                                                                                                                                         |
| √                                          | Use of hand searching                                                                                      | Included articles and relevant reviews were manually searched for additional eligible articles.                                                                                                                                                                                                                                                                                                                                                                                                                                                                                                                                                                                                                         |
| √                                          | List of citations located and those excluded, including justifications                                     | Details of the literature search process are outlined in the flow chart. A list of excluded articles is available upon request.                                                                                                                                                                                                                                                                                                                                                                                                                                                                                                                                                                                         |
| √                                          | Method of addressing articles published in languages other than English                                    | All articles eligible for inclusion were published in English.                                                                                                                                                                                                                                                                                                                                                                                                                                                                                                                                                                                                                                                          |
| √                                          | Method of handling abstracts and unpublished studies                                                       | All trials and studies eligible for inclusion were published as full paper articles.                                                                                                                                                                                                                                                                                                                                                                                                                                                                                                                                                                                                                                    |
| √                                          | Description of any contact with authors                                                                    | When necessary authors of eligible trials were contacted in order to provide additional information.                                                                                                                                                                                                                                                                                                                                                                                                                                                                                                                                                                                                                    |
| <b>Reporting of methods should include</b> |                                                                                                            |                                                                                                                                                                                                                                                                                                                                                                                                                                                                                                                                                                                                                                                                                                                         |
| √                                          | Description of relevance or appropriateness of studies assembled for assessing the hypothesis to be tested | Inclusion and exclusion criteria are described in the methods section.                                                                                                                                                                                                                                                                                                                                                                                                                                                                                                                                                                                                                                                  |
| √                                          | Rationale for the selection and coding of data                                                             | Data on patient characteristics at inclusion and during follow up were selected based on the prognostic factors in HBV and known risk factors for HCC.<br>Extracted data included: country of origin, duration of follow up, interventions (type, length of treatment and treatment doses), proportion of men; proportion of patients with histological or clinical cirrhosis; severity of underlying liver disease; proportion of hepatitis envelope antigen (HBeAg) positive patients; proportion of patients with a virological response (loss of hepatitis B virus DNA (HBV DNA)), serological response (HBeAg- and HBsAg-seroconversions) or biochemical response (normalisation of liver function tests including |

|   |                                                                                                                                            |                                                                                                                                                                                                                                                                                                                                                                                                                                                                                                                                                                                                                                                                                                                                                                                                                                                                                                                                                                                                                                                                                                                                                                                                                                                                 |
|---|--------------------------------------------------------------------------------------------------------------------------------------------|-----------------------------------------------------------------------------------------------------------------------------------------------------------------------------------------------------------------------------------------------------------------------------------------------------------------------------------------------------------------------------------------------------------------------------------------------------------------------------------------------------------------------------------------------------------------------------------------------------------------------------------------------------------------------------------------------------------------------------------------------------------------------------------------------------------------------------------------------------------------------------------------------------------------------------------------------------------------------------------------------------------------------------------------------------------------------------------------------------------------------------------------------------------------------------------------------------------------------------------------------------------------|
|   |                                                                                                                                            | aspartate aminotransferase and alanine aminotransferase); and whether HCC screening was performed.                                                                                                                                                                                                                                                                                                                                                                                                                                                                                                                                                                                                                                                                                                                                                                                                                                                                                                                                                                                                                                                                                                                                                              |
| √ | Assessment of confounding                                                                                                                  | Sensitivity analyses are described in the methods section.                                                                                                                                                                                                                                                                                                                                                                                                                                                                                                                                                                                                                                                                                                                                                                                                                                                                                                                                                                                                                                                                                                                                                                                                      |
| √ | Assessment of study quality, including blinding of quality assessors; stratification or regression on possible predictors of study results | Bias assessment are described in short in the methods section. In details: The allocation sequence generation was classed as adequate if based on computer generated random numbers, a table of random numbers or similar. The allocations concealment was classed as adequate if patients were randomised through a central independent unit, serially numbered, opaque sealed envelopes or similar. Due to the objective nature of the primary outcome measures assessed, the importance of blinding was limited. Blinding was primarily extracted for the assessment of the secondary outcome measure and was classed as adequate if patients, personnel or investigators were blinded. Outcome data were classed as complete if there were no missing data, if reasons for missing data were unlikely to be related to true outcome, if missing data were balanced in numbers between intervention groups and if the proportion of missing data was too small to induce clinically relevant impact on the intervention effect estimate. Reporting of data was classed as adequate if all expected clinically relevant outcomes were reported. Other bias included whether a sample size calculation had been performed and whether the sample size was met. |
| √ | Assessment of heterogeneity                                                                                                                | Assessment of heterogeneity is described in the methods section.<br>$I^2$ values below 30% were considered unimportant. Values between 30% and 50% represented a moderate risk of heterogeneity, values between 50% and 75% a substantial risk of heterogeneity and values between 75% and 100% represented considerable heterogeneity.                                                                                                                                                                                                                                                                                                                                                                                                                                                                                                                                                                                                                                                                                                                                                                                                                                                                                                                         |
| √ | Description of statistical methods in sufficient detail to be replicated                                                                   | The statistics used are described in the methods section.                                                                                                                                                                                                                                                                                                                                                                                                                                                                                                                                                                                                                                                                                                                                                                                                                                                                                                                                                                                                                                                                                                                                                                                                       |
| √ | Provision of appropriate tables and graphics                                                                                               | We have provided the following: Figure 1: Trial Flow Diagram;; Figure 2-4: Forest plots for subgroups and treatment effect on HCC incidence and mortality; Table 1: Characteristics of Included Studies; Table 2: Patient Characteristics in Included Studies; Table                                                                                                                                                                                                                                                                                                                                                                                                                                                                                                                                                                                                                                                                                                                                                                                                                                                                                                                                                                                            |

|   |                                                                   |                                                                                                                                                                                                                                                                                                                                                   |
|---|-------------------------------------------------------------------|---------------------------------------------------------------------------------------------------------------------------------------------------------------------------------------------------------------------------------------------------------------------------------------------------------------------------------------------------|
|   |                                                                   | 3: Risk of Bias Summary                                                                                                                                                                                                                                                                                                                           |
|   | <b>Reporting of results should include</b>                        |                                                                                                                                                                                                                                                                                                                                                   |
| √ | Graph summarizing individual study estimates and overall estimate | Figure 2-4                                                                                                                                                                                                                                                                                                                                        |
| √ | Table giving descriptive information for each study included      | Table 1-3                                                                                                                                                                                                                                                                                                                                         |
| √ | Results of sensitivity testing                                    | Sensitivity and subgroup analyses are described under the results section.                                                                                                                                                                                                                                                                        |
| √ | Indication of statistical uncertainty of findings                 | Results are presented as RR with 95% confidence intervals and I <sup>2</sup> values. Sensitivity analyses using a fixed effects model have been done for all analyses. For results showing a statistical significant effect Eggers test of bias and sequential analyses have been performed to test for small study effects and multiple testing. |
|   | <b>Reporting of discussion should include</b>                     |                                                                                                                                                                                                                                                                                                                                                   |
| √ | Quantitative assessment of bias                                   | Quantitative assessment of bias are described in the discussion section.                                                                                                                                                                                                                                                                          |
| √ | Justification for exclusion                                       | Reasons for exclusion of observational studies in the primary analyses are described in the discussion.                                                                                                                                                                                                                                           |
| √ | Assessment of quality of included studies                         | Quality assessment are described in both the results and the discussion sections.                                                                                                                                                                                                                                                                 |
|   | <b>Reporting of conclusions should include</b>                    |                                                                                                                                                                                                                                                                                                                                                   |
| √ | Consideration of alternative explanations for observed results    | Alternative explanations for observed results have been described in the discussion section                                                                                                                                                                                                                                                       |
| √ | Generalization of the conclusions                                 | Generalizations have been described in the discussion section                                                                                                                                                                                                                                                                                     |
| √ | Guidelines for future research                                    | Guidelines for future research have been described in the discussion section                                                                                                                                                                                                                                                                      |
| √ | Disclosure of funding source                                      | Disclosures and author contributions are reported.                                                                                                                                                                                                                                                                                                |



**ANTIVIRAL THERAPY FOR PREVENTION OF  
HEPATOCELLULAR CARCINOMA AND MORTALITY IN  
CHRONIC HEPATITIS B: SYSTEMATIC REVIEW AND META-  
ANALYSIS**

|                                 |                                                                                                                                                                                                                                                                                                                                           |
|---------------------------------|-------------------------------------------------------------------------------------------------------------------------------------------------------------------------------------------------------------------------------------------------------------------------------------------------------------------------------------------|
| Journal:                        | <i>BMJ Open</i>                                                                                                                                                                                                                                                                                                                           |
| Manuscript ID:                  | bmjopen-2013-003265.R1                                                                                                                                                                                                                                                                                                                    |
| Article Type:                   | Research                                                                                                                                                                                                                                                                                                                                  |
| Date Submitted by the Author:   | 08-Jul-2013                                                                                                                                                                                                                                                                                                                               |
| Complete List of Authors:       | Thiele, Maja; Odense University Hospital, Department of Gastroenterology and Hepatology<br>Gluud, Lise; Copenhagen University Hospital Gentofte, Department of Medicine<br>Dahl, Emilie; Copenhagen University, Faculty of Health Sciences<br>Krag, Aleksander; Odense University Hospital, Department of Gastroenterology and Hepatology |
| <b>Primary Subject Heading</b>: | Gastroenterology and hepatology                                                                                                                                                                                                                                                                                                           |
| Secondary Subject Heading:      | Evidence based practice, Pharmacology and therapeutics                                                                                                                                                                                                                                                                                    |
| Keywords:                       | Adult gastroenterology < GASTROENTEROLOGY, Hepatobiliary disease < GASTROENTEROLOGY, Hepatobiliary tumours < ONCOLOGY                                                                                                                                                                                                                     |
|                                 |                                                                                                                                                                                                                                                                                                                                           |

SCHOLARONE™  
Manuscripts

Only



1  
2  
3  
4 **ANTIVIRAL THERAPY FOR PREVENTION OF**  
5  
6  
7 **HEPATOCELLULAR CARCINOMA AND MORTALITY IN**  
8  
9  
10 **CHRONIC HEPATITIS B: SYSTEMATIC REVIEW AND META-**  
11  
12 **ANALYSIS**  
13

14  
15  
16  
17  
18  
19 **Short title:** Antiviral therapy for hepatitis B  
20  
21

22  
23  
24  
25 Maja Thiele *research associate*<sup>1</sup>, Lise-Lotte Gluud *associate professor*<sup>2</sup>, Emilie Kirstine  
26  
27 Dahl *research assistant*<sup>3</sup>, Aleksander Krag *professor of hepatology*<sup>1</sup>.  
28  
29

30  
31  
32  
33  
34 **Author affiliations:** <sup>1</sup>Department of Gastroenterology and Hepatology, Odense University  
35  
36 Hospital, Sdr. Boulevard 29, DK-5000 Odense, Denmark; <sup>2</sup>Department of Medicine,  
37  
38 Copenhagen University Hospital of Gentofte, Niels Andersensvej 65, DK-2900 Hellerup,  
39  
40 Denmark; <sup>3</sup>Faculty of Health Sciences, University of Copenhagen, Blegdamsvej 3, DK-  
41  
42 2100 Copenhagen, Denmark.  
43  
44

45  
46 **Correspondence to:** M. Thiele, Department of Gastroenterology and Hepatology, Odense  
47  
48 University Hospital, Sdr. Boulevard 29, entrance 126, 2. floor, DK-5000 Odense C,  
49  
50 Denmark. Email: maja.thiele@rsyd.dk  
51

52  
53  
54 **Abstract word count: 298**  
55

56  
57 **Total word count: 5955**  
58  
59  
60

## ABSTRACT

**Background:** The effect of antiviral therapy on clinical outcomes in chronic hepatitis B (HBV) is not established.

**Objectives:** To assess the effect of antiviral treatment (interferon and/or nucleoside analogues) versus placebo or no intervention on prevention of hepatocellular carcinoma (HCC) and mortality in chronic hepatitis B.

**Design:** Random effects pair-wise meta-analysis of randomised trials and observational studies.

**Data sources:** Electronic and manual searches were combined.

**Study selection:** Randomised controlled trials (RCTs) were included in the primary analyses. Observational studies were included in sensitivity analyses.

**Data extraction:** Two independent reviewers extracted data and evaluated bias control. The primary outcome measures were HCC incidence and mortality.

**Data synthesis:** We included eight RCTs, eight prospective cohort studies and 19 case-control studies with a total of 3433 patients allocated to antiviral therapy and 4625 controls. The maximum duration of follow up was 23 years. Randomised trials found no effect of antiviral therapy on HCC or mortality. Cohort studies found that antiviral therapy increased the risk of HCC (risk ratio 1.43; 95% confidence interval 1.06 to 1.95) whereas case control studies found a decreased risk of HCC in the intervention group (risk ratio 0.69; 95% confidence interval 0.54 to 0.88). There was a clear difference between the results of RCTs and observational studies (test for subgroup differences  $P < 0.001$ ).

1  
2  
3  
4 Antiviral therapy did not affect mortality in cohort studies, but reduced mortality in case  
5  
6 control studies (relative risk 0.71; 95% confidence interval 0.54 to 0.93; test for subgroup  
7  
8 differences, P=0.406).  
9

10  
11 **Conclusions:** The effect of antiviral therapy on clinical outcomes in HBV remains to be  
12  
13 established. Although there was a positive effect in the sensitivity analyses, the strength of  
14  
15 the evidence does not allow for extrapolation to clinical practice as research design plays  
16  
17 an essential role in the overall assessment.  
18  
19

20  
21 **Trial registration number:** Prospero number CRD42013003881  
22  
23  
24  
25  
26  
27  
28  
29  
30  
31  
32  
33  
34  
35  
36  
37  
38  
39  
40  
41  
42  
43  
44  
45  
46  
47  
48  
49  
50  
51  
52  
53  
54  
55  
56  
57  
58  
59  
60

## ARTICLE SUMMARY

### Article focus

- The effect of antiviral treatment for chronic hepatitis B has been assessed using surrogate markers.
- An evaluation of the effect on hepatocellular carcinoma and mortality is missing.

### Key messages

- Research design plays an essential role on hepatocellular carcinoma incidence estimates. As prospective cohorts and case-control series show opposing results, reports from such trials should be interpreted with caution.
- Sensitivity analyses show a positive effect of treatment on mortality.

### Strengths and limitations of this study

- A large number of observational studies were included allowing for detailed sensitivity analyses with tests for subgroup differences.
- Only 8 randomised controlled trials were included.
- The effect of modern nucleos(t)ides could not be assessed as newer trials does not include placebo treated or untreated patients in the control groups.

## INTRODUCTION

Worldwide, two billion people have been infected with hepatitis B. Chronic hepatitis B (HBV) may lead to hepatocellular carcinoma (HCC), cirrhosis and liver failure and each year, about 600 000 people die due to hepatitis<sup>1-3</sup>. Globally, HCC is the fifth most common cause of cancer deaths in men, and the sixth in women<sup>4-6</sup>. Vaccine programs have decreased the incidence of HBV<sup>7 8</sup>, but mortality from HBV related HCC and cirrhosis is increasing due to the high prevalence of chronically infected patients<sup>9 10</sup>. The aim of antiviral treatment is to prevent progression to these clinical outcome measures<sup>11-13</sup>. Recommended treatments include interferon and nucleos(t)ide analogues (NA)<sup>14 15</sup>. A viral response may reduce the risk of HCC<sup>12</sup>, but the results of clinical studies and meta-analyses on antiviral therapy are not consistent<sup>16-24</sup>. One meta-analysis<sup>25</sup> found that antiviral therapy decreased liver-related mortality whereas a cohort series found decreased overall mortality in patients with a viral response to interferon<sup>26</sup>. On the other hand, RCTs have failed to show an effect on HCC or mortality<sup>27 28</sup>. We therefore conducted a systematic review of the evidence on antiviral treatment for prevention of HCC and mortality in patients with HBV.

## METHODS

### Scope

This systematic review evaluates the effects of antiviral therapy versus placebo or no intervention on prevention of HCC and mortality in patients with HBV. The review is based on a registered written protocol (Prospero number CRD42013003881) according to the methods specified in the Cochrane Handbook for Reviews on Interventions<sup>29</sup> and the MOOSE Guidelines for Meta-Analyses and Systematic Reviews of Observational Studies<sup>30</sup>. For a more detailed description of the methods, please see the MOOSE checklist (appendix 1).

### Data sources

Eligible trials were identified through electronic and manual searches. Electronic searches were performed in MEDLINE (1966-2012), EMBASE (1928-2012), and Web of Science (1900-2012). Literature searches included keywords for HCC, chronic hepatitis B, and antiviral treatment. Manual searches included scanning of reference lists in relevant papers and conference proceedings and the International Clinical Trials Registry Platform.

### Study selection

Our primary analyses included RCTs (primary analyses) on antiviral interventions (interferon and/or NA) versus placebo or no intervention for patients with HBV who had not previously received antiviral therapy (treatment naïve). Due to the expected prognosis and the duration of follow up necessary to evaluate intervention effects on clinical outcome measures in HBV, observational studies were included in sensitivity analyses. The primary outcome measures were HCC diagnosed using recommended criteria<sup>31 32</sup> and all-cause

1  
2  
3  
4 mortality. To avoid prevalent cases of HCC the outcomes were assessed after at least 12  
5  
6 months of follow up. Some studies did not perform screening ultrasonography and would  
7  
8 therefore not detect small HCC present at inclusion. Twelve months was therefore  
9  
10 chosen as a limit. The secondary outcome measure was HCC related mortality.  
11  
12

### 13 14 **Data extraction and quality assessment**

15  
16 Two authors extracted data independently. When data were not available in the published  
17  
18 reports, additional information was retrieved through correspondence with the primary  
19  
20 investigators.  
21  
22

23  
24 The Cochrane Collaboration's Tool for Assessing Risk of Bias was used to evaluate bias  
25  
26 control in RCTs. The assessment included the randomisation methods (allocation  
27  
28 sequence generation and allocation concealment), blinding (of participants, personnel and  
29  
30 investigators), the completeness of outcome data, reporting of data and other biases<sup>33</sup>. All  
31  
32 observational studies were classed as having a high risk of bias. Based on the MOOSE  
33  
34 guidelines, the assessment of potential sources of bias within observational studies  
35  
36 included documentation of how data were classified and coded (multiple raters, blinding  
37  
38 and interrater reliability), assessment of confounding (comparability of cases and controls  
39  
40 in studies where appropriate) and blinding of quality assessors, stratification or regression  
41  
42 on possible predictors of study results.  
43  
44  
45  
46  
47

### 48 **Data synthesis and analysis**

49  
50 Statistics were performed using Stata Version 12 (Statacorp, College Station, TX, USA)  
51  
52 and Trial Sequential Analysis (CTU, Copenhagen, Denmark). Meta-analyses were  
53  
54 performed with results expressed as risk ratios, 95% CI and  $I^2$  as a marker of  
55  
56  
57  
58  
59  
60

1  
2  
3  
4 heterogeneity. For meta-analyses showing a statistically significant effect the number  
5  
6 needed to treat was calculated based on the risk difference. Initial sensitivity analyses  
7  
8 included repeating all meta-analyses using both random and fixed effect models. The  
9  
10 results of these analyses were only reported if the conclusions differed. Regression  
11  
12 analyses were performed to assess for publication bias and other small study effects  
13  
14 (Egger's test). Sequential analyses were performed for meta-analyses showing an  
15  
16 intervention effect after adjusting for the risk of bias associated with cumulative testing<sup>34</sup>.  
17  
18 The sequential analysis was performed using a random-effects model, alpha (5%), power  
19  
20 (80%) and the incidence rates and the intervention effects identified in the meta-analyses.  
21  
22 Pre-planned sensitivity analyses were performed with inclusion of observational studies.  
23  
24 These analyses were performed stratified by study design (RCT, prospective cohort or  
25  
26 case-control study) and with fixed-effect inverse variance models that compared the  
27  
28 results of subgroups. The result of the subgroup comparisons was expressed as P values  
29  
30 (test for subgroup differences). Additional sensitivity analyses were performed to evaluate  
31  
32 the influence of bias control (limiting the analysis to trials with adequate randomisation),  
33  
34 the type of antiviral therapy (comparing interferon, NA or both), and the effect HCC  
35  
36 screening (comparing the results of trials with or without screening). Finally, subgroup  
37  
38 analyses including only patients with cirrhosis were performed.  
39  
40  
41  
42  
43  
44  
45  
46  
47  
48  
49  
50  
51  
52  
53  
54  
55  
56  
57  
58  
59  
60



## RESULTS

### Literature searches and study inclusion

The electronic and manual searches identified 27 474 potentially relevant records (figure 1). After excluding duplicates and studies that did not fulfil our inclusion criteria, 36 references referring to eight RCTs, eight prospective cohort studies and 19 case control studies were included<sup>26-28 35-67</sup>.

### Characteristics of included RCTs and observational studies

The RCTs were conducted in Europe (n=4), Asia (n=2) and Africa (n=2). The duration of follow up ranged from one to 11 years. One trial performed HCC screening. Six trials assessed interferon and two trials NA (table 1). A total of 840 patients received antiviral therapy and 447 patients received placebo or no intervention. The proportion of men ranged from 70 to 100% and the mean age from 33 to 44 years. The proportion of patients with cirrhosis at inclusion ranged from zero to 66% (table 2). The proportion of patients with a virological response ranged from seven to 58% in the treatment group and from one to 22% of controls. A biochemical response was achieved for 14 to 66% of patients in the treatment and one to 20% of controls. The randomisation methods were described as adequate in three trials (table 3).

The prospective cohorts and case control studies were conducted in Europe (n=12), Asia (n=13), North America (n=1) and South America (n=1). The duration of follow up ranged from two to 23 years. HCC screening was performed in all prospective cohort studies and in 13 of the case control studies. Eighteen studies assessed interferon, seven assessed NA and two combined therapy with interferon and NA (table 1). A total of 2593 patients

1  
2  
3  
4 received antiviral therapy and 4178 patients received no intervention. The proportion of  
5  
6 men ranged from 53 to 95% and the mean age from 27 to 65 years. The proportion of  
7  
8 patients with cirrhosis ranged from zero to 100% (table 2). In the prospective cohorts, the  
9  
10 proportion of patients with a virological response in the treatment and control groups was  
11  
12 23 to 69% and zero to 23%, respectively. A biochemical response was achieved for 23 to  
13  
14 69% of patients in the treatment groups and 31% in the control group (only reported in one  
15  
16 study). In the case control series, the proportion of patients with a virological response in  
17  
18 the treatment and control group ranged from 7 to 78% and two to 100%, respectively. A  
19  
20 biochemical response in the two groups was 27 to 68% and four to 51%, respectively.  
21  
22  
23  
24

## 25 **Prevention of HCC**

26  
27  
28 HCC was diagnosed in 22 of 768 patients in the treatment group versus 19 of 391 controls  
29  
30 (relative risk 0.58; 95% confidence interval 0.32-1.07;  $I^2=0\%$ ). There was no evidence of  
31  
32 small study effects (Egger's test,  $P=0.269$ ) and no difference between subgroups of trials  
33  
34 assessing interferon or NA (test for subgroup differences  $P=0.854$ ). The overall result was  
35  
36 confirmed in sensitivity analyses including RCTs with a low risk of bias and trials with HCC  
37  
38 screening.  
39  
40  
41

42  
43 Sensitivity analyses including prospective cohort studies and case control studies were  
44  
45 performed. In the cohort studies, HCC was diagnosed in 51 of 436 patients in the  
46  
47 treatment group and 174 of 1853. In the case control studies the numbers were 99 of 1778  
48  
49 and 201 of 1827 patients, respectively. A meta-analysis that combined RCTs and  
50  
51 observational studies found no effect of antiviral therapy on HCC (relative risk 0.88; 95%  
52  
53 confidence interval 0.73 to 1.05;  $I^2=63\%$ ). There was no evidence of small study effects  
54  
55 (Egger's test  $P=0.730$ ). Subgroup analyses showed a clear difference between the RCTs,  
56  
57  
58  
59  
60

1  
2  
3  
4 prospective cohorts and case control studies (test for subgroup differences  $P < 0.001$ )  
5  
6 (figure 2). The prospective cohort studies found that antiviral therapy increased the risk of  
7  
8 HCC (relative risk 1.44; 95% confidence interval 1.06 to 1.95) whereas the case control  
9  
10 studies found that antiviral therapy reduced the risk of HCC (relative risk 0.69; 95%  
11  
12 confidence interval 0.54 to 0.88). Due to the high heterogeneity, a post-hoc meta-  
13  
14 regression analysis was performed. We evaluated study and patient characteristics not  
15  
16 accounted for in the sensitivity analyses, which may have influenced the result. No  
17  
18 modifiers were found when adjusting for the following variables: proportion of men  
19  
20 (coefficient -0.074;  $P = 0.08$ ) mean age of treated patients at inclusion (coefficient 0.020;  
21  
22  $P = 0.94$ ), mean age of untreated patients at inclusion (coefficient 0.121;  $P = 0.65$ ),  
23  
24 proportion with cirrhosis at inclusion (coefficient -0.001;  $P = 0.76$ ), and region of trial  
25  
26 (coefficient -0.394;  $P = 0.55$ ).  
27  
28  
29

30  
31 To further evaluate the influence of bias on overall results, we performed additional  
32  
33 subgroup analysis in which trials were stratified for HCC screening. The analysis found  
34  
35 eight trials that did not perform HCC screening (relative risk 0.40; 95% confidence interval  
36  
37 0.26 to 0.63) and 18 trials that did perform HCC screening (relative risk 1.03; 95%  
38  
39 confidence interval 0.84 to 1.25). The results of subgroups were clearly different (test for  
40  
41 subgroup differences  $P < 0.001$ ).  
42  
43  
44

45  
46 Sensitivity analyses were performed to evaluate the risk of HCC among patients with  
47  
48 cirrhosis. In the RCTs, one of 20 patients in the treatment group and two of 12 controls  
49  
50 developed HCC (relative risk 0.75; 95% confidence interval 0.10 to 5.77). In the  
51  
52 prospective cohort studies 32 of 184 versus 142 of 482 patients developed HCC whereas  
53  
54 the numbers were 63 of 680 versus 161 of 955, respectively for case control studies.  
55  
56  
57  
58  
59  
60

1  
2  
3  
4 Overall, antiviral therapy reduced the risk of HCC when including data from RCTs and  
5  
6 observational studies (relative risk 0.74; 95% confidence interval 0.57 to 0.96;  $I^2=0\%$ ;  
7  
8 number needed to treat 28 patients) (fig 3). The results of RCTs and observational studies  
9  
10 were similar (test for subgroup differences  $P=0.159$ ). There was no evidence of small  
11  
12 study effects (Egger's test  $P=0.890$ ). In trial sequential analysis, the monitoring and alpha-  
13  
14 spending boundary did not cross suggesting that the result was not robust to adjustment  
15  
16 for multiple testing.  
17  
18  
19

## 20 21 **Mortality**

22  
23 In the RCTs, there was no difference in mortality between the treatment and control group  
24  
25 (21 of 508 versus 9 of 271 patients; relative risk 1.24; 95% confidence interval 0.58 to  
26  
27 2.66;  $I^2=0\%$ ). No evidence of small study effects (Egger's test  $P=0.783$ ) and no difference  
28  
29 between trials stratified by treatment (test for subgroup differences  $P=0.668$ ) or HCC  
30  
31 screening ( $P=0.828$ ). In the observational studies, the number of patients in the treatment  
32  
33 and control groups who died was 51 of 655 versus 247 of 2231 for prospective cohort  
34  
35 studies and 79 of 506 versus 92 of 413 in the cohort studies. When combining RCTs and  
36  
37 observational studies, random effects meta-analysis showed that antiviral treatment  
38  
39 decreased mortality (relative risk 0.76; 95% confidence interval 0.62 to 0.95;  $I^2=14\%$ ;  
40  
41 number needed to treat 77; Egger's test  $P=0.487$ ) (fig 4). There was no difference  
42  
43 between RCTs and observational studies (test for subgroup differences  $P=0.406$ ). In the  
44  
45 trial sequential analysis, the monitoring boundary crossed the alpha-spending boundary in  
46  
47 2004 suggesting that the meta-analysis was robust to adjustments for multiple testing.  
48  
49  
50  
51

52  
53 Only observational studies reported mortality in patients with cirrhosis. The number of  
54  
55 patients who died in the intervention and control groups was 36 of 298 versus 141 of 499  
56  
57  
58  
59  
60

1  
2  
3  
4 (relative risk 0.61; 95% confidence interval 0.44 to 0.86;  $I^2=9%$ ; number needed to treat 16  
5  
6 patients). There were no small study effects (Egger's test  $P=0.533$ ) and no difference  
7  
8 between prospective cohort and case control studies (test for subgroup differences  
9  
10  $P=0.292$ ).

### 14 **HCC related mortality**

16  
17 Antiviral therapy had no effect on HCC related mortality (3 of 282 versus 2 of 154; relative  
18  
19 risk 0.50; 95% confidence interval 0.10 to 2.44;  $I^2=0%$ ,  $n=2$  RCT). Including data from  
20  
21 observational studies had little influence on the overall result (38 of 1233 versus 144 of  
22  
23 2632; relative risk 0.83; 95% confidence interval 0.5 to 1.20;  $I^2=0%$ ; Egger's test  $P=0.248$ ).  
24  
25 There was no difference between subgroups of trials stratified by design (test for subgroup  
26  
27 differences  $P=0.481$ ).  
28  
29  
30  
31  
32  
33  
34  
35  
36  
37  
38  
39  
40  
41  
42  
43  
44  
45  
46  
47  
48  
49  
50  
51  
52  
53  
54  
55  
56  
57  
58  
59  
60

## DISCUSSION

This systematic review found that the evidence of the effect of antiviral therapy on clinical outcomes in HBV is weak. RCTs found no benefit of treatment on HCC, mortality or HCC related mortality in HBV. The total number of patients and duration of follow up may be too small to determine clinical effects. The inclusion of observational studies did not strengthen the overall findings because there was clear evidence of bias suggesting that the study design was closely related to the estimated treatment effects. The prospective cohort studies found that antiviral therapy increased the risk of HCC and had no effect on mortality. The case control studies found that antiviral therapy reduced both HCC and mortality. These findings suggest that detection and ascertainment bias as well as confounding by indication had a considerable influence on the overall result, which may explain why previous meta-analyses have disagreed in their assessment of the benefit of antiviral therapy<sup>16-18 20 21 23 24</sup>. The importance of detection bias was underlined in the subgroup analysis of HCC screening. No intervention effect was found in trials that performed systematic HCC screening.

The main limitation of our review is the limited number of RCTs. Only one of the included trials had prevention of HCC as a primary outcome measure<sup>27</sup> and none were designed to evaluate the effect on mortality or HCC related mortality. Tests to evaluate the robustness of the results (including Egger's test) were difficult to interpret.

The current recommendation to treat patients with HBV is primarily based on surrogate outcomes. At present the evidence supporting the use of virological markers as surrogate outcomes is weak. The fact that some studies have found a correlation between a

1  
2  
3  
4 virological response and improved liver histology does not necessarily validate their use as  
5  
6 surrogate outcomes. Previous evidence shows that interventions supported by surrogate  
7  
8 markers may in fact have no benefit or even harmful effects on clinical outcome  
9  
10 measures<sup>68</sup>. Still, our findings are not sufficiently convincing and do not allow for changes  
11  
12 in clinical practice.  
13

14  
15  
16 Another limitation of the current review is our failure to extract data for analyses of  
17  
18 treatment responders versus non-responders. However, only six cases of HCC were  
19  
20 reportedly diagnosed in patients with biochemical or viral treatment response. This  
21  
22 suggests that treatment response does not lead to elimination of the HCC risk, but  
23  
24 probably decreases HCC incidence compared to non- or partial-responders. This would be  
25  
26 in line with previous findings<sup>19 25</sup>. The majority of included trials in the current review  
27  
28 assessed first generation NA and interferon, as reflected in low response rates. It was  
29  
30 however not within the scope of the review to investigate modern antiviral treatments, as  
31  
32 we included untreated control groups. Newer treatments will likely result in more patients  
33  
34 achieving sustained suppression of HBV-DNA. It is therefore possible that the current  
35  
36 review underestimates a potential treatment effect. It would also have been of interest had  
37  
38 we been able to adjust for other common risk factors for HCC such as non-alcoholic  
39  
40 steatohepatitis, alcoholic liver disease and coinfection with hepatitis C, hepatitis D and  
41  
42 human immunodeficiency virus. Although these data were extracted, there was not  
43  
44 enough data to allow for analyses.  
45  
46  
47  
48

49  
50 There are several potential explanations for the discrepancies between RCTs and  
51  
52 observational studies<sup>69</sup>. The fact that only prospective cohort studies found an increased  
53  
54 risk of HCC among patients receiving antiviral therapy opposes speculations that the  
55  
56  
57  
58  
59  
60

1  
2  
3  
4 treatment affected HCC development. The findings are more likely to reflect baseline  
5  
6 differences in the viral load, genotype and degree of liver disease. The degree of  
7  
8 monitoring in the treatment and control group is also likely to differ and may lead to  
9  
10 detection bias. The importance of detection bias is further supported by the subgroup  
11  
12 differences observed according to HCC screening. The case control studies are likely to  
13  
14 have an even higher risk of bias, as confounding by indication and ascertainment bias is  
15  
16 likely to exist in retrospective studies. Reporting bias should also be considered<sup>33</sup>.  
17  
18  
19

20  
21 The subgroup differences with regards to type of intervention suggests a possible anti-  
22  
23 carcinogenic effect of interferon, as seen in HCV<sup>70</sup>. We additionally found a decrease in  
24  
25 both HCC incidence and overall mortality in sensitivity analyses of patients with cirrhosis.  
26  
27 This could support the case for continued treatment of patients with cirrhosis.  
28  
29

30  
31 We found a beneficial effect of interferon and/or NA on mortality in HBV when including  
32  
33 RCTs and observational studies in chronic HBV patients. The assessment of mortality is  
34  
35 robust to bias<sup>71</sup>. Accordingly, our subgroup analysis showed no clear relation between the  
36  
37 results and the study design. HCC mortality is more prone to bias. Whether antiviral  
38  
39 treatment for HBV decreases mortality except from HCC is unknown.  
40  
41

42  
43 In conclusion, antiviral treatment for HBV has no proven effect on the clinical outcomes  
44  
45 HCC and mortality. Bias has a paramount impact on treatment effect estimates in  
46  
47 observational studies and we recommend a critical approach to conclusions drawn in such  
48  
49 studies. Future trials on antiviral treatment for HBV should be designed to show an effect  
50  
51 on clinical endpoints rather than surrogate markers.  
52  
53  
54  
55  
56  
57  
58  
59  
60



1  
2  
3  
4 **Contributors:** MT, LLG and AK conceived the idea and design. MT and EKD collected  
5  
6 and assembled data. MT, LLG and AK analysed and interpreted the data. MT and LLG  
7  
8 drafted the manuscript. LLG, EKD and AK revised the manuscript for important intellectual  
9  
10 content. All authors discussed and approved of the final version of the manuscript. MT is  
11  
12 guarantor.

13  
14  
15  
16 **Competing interests:** All authors have completed the ICMJE uniform disclosure form at  
17  
18 [www.icmje.org/coi\\_disclosure.pdf](http://www.icmje.org/coi_disclosure.pdf) (available on request from the corresponding author)  
19  
20 and declare: no support from any organisation for the submitted work; no financial  
21  
22 relationships with any organisations that might have an interest in the submitted work in  
23  
24 the previous three years; no other relationships or activities that could appear to have  
25  
26 influenced the submitted work.  
27  
28

29  
30 **Ethical approval:** Not required.  
31  
32

33  
34 **Data sharing:** Dataset available from the corresponding author.  
35  
36

37 **Licence statement:** Corresponding Author has the right to grant on behalf of all authors  
38  
39 and does grant on behalf of all authors, an exclusive licence (or non exclusive for  
40  
41 government employees) on a worldwide basis to the BMJ Publishing Group Ltd to permit  
42  
43 this article (if accepted) to be published in BMJ editions and any other BMJ PGL products  
44  
45 and sublicences such use and exploit all subsidiary rights, as set out in our licence.  
46  
47  
48  
49  
50  
51  
52  
53  
54  
55  
56  
57  
58  
59  
60

## FIGURE LEGENDS

1  
2  
3  
4  
5  
6  
7 *Figure 1. Study flow diagram.*  
8  
9

10 *Figure 2. Random effects inverse variance meta-analysis of antiviral therapy*  
11 *treatment effect on hepatocellular carcinoma in patients with chronic hepatitis B,*  
12 *subgroups according to trial design.*  
13  
14  
15  
16

17 *Figure 3. Random effects inverse variance meta-analysis of antiviral therapy*  
18 *treatment effect on hepatocellular carcinoma in patients with chronic hepatitis B*  
19 *and cirrhosis, subgroups according to trial design.*  
20  
21  
22  
23

24 *Figure 4. Random effects inverse variance meta-analysis of antiviral therapy*  
25 *treatment effect on mortality in patients with chronic hepatitis B, subgroups*  
26 *according to trial design.*  
27  
28  
29  
30  
31  
32  
33  
34  
35  
36  
37  
38  
39  
40  
41  
42  
43  
44  
45  
46  
47  
48  
49  
50  
51  
52  
53  
54  
55  
56  
57  
58  
59  
60

## REFERENCES

1. WHO. Position Paper: Hepatitis B. *WHO Weekly Epidemiological Report: World Health Organization*, 2009.
2. Perz JF, Armstrong GL, Farrington LA, Hutin YJF, Bell BP. The contributions of hepatitis B virus and hepatitis C virus infections to cirrhosis and primary liver cancer worldwide. *J Hepatol* 2006;45(4):529-38.
3. WHO. Hepatitis C Fact Sheet.  
<http://www.who.int/mediacentre/factsheets/fs164/en/index.html>: World Health Organization, 2012.
4. Ferlay J, Shin HR, Bray F, Forman D, Mathers C, Parkin DM. GLOBOCAN 2008 v2.0, Cancer Incidence and Mortality Worldwide: IARC CancerBase No. 10. Lyon, France: International Agency for Research on Cancer, 2010.
5. El-Serag HB. Hepatocellular carcinoma. *N Engl J Med* 2011;365(12):1118-27.
6. El-Serag HB. Epidemiology of Viral Hepatitis and Hepatocellular Carcinoma. *Gastroenterology* 2012;142(6):1264-73.e1.
7. Ni Y-H, Chang M-H, Wu J-F, Hsu H-Y, Chen H-L, Chen D-S. Minimization of hepatitis B infection by a 25-year universal vaccination program. *Journal of Hepatology* 2012;57(4):730-35.
8. Ott JJ, Stevens GA, Groeger J, Wiersma ST. Global epidemiology of hepatitis B virus infection: New estimates of age-specific HBsAg seroprevalence and endemicity. *Vaccine* 2012;30(12):2212-19.
9. Ly KN, Jian X, Klevens RM, Jiles RB, Ward JW, Holmberg SD. The Increasing Burden of Mortality From Viral Hepatitis in the United States Between 1999 and 2007. *Annals of Internal Medicine* 2012;156(4):271-W-52.
10. Fattovich G, Bortolotti F, Donato F. Natural history of chronic hepatitis B: Special emphasis on disease progression and prognostic factors. *Journal of Hepatology* 2008;48(2):335-52.
11. Chen CJ, Yang HI, Iloeje UH, The R-HBVS G. Hepatitis B virus DNA levels and outcomes in chronic hepatitis B. *Hepatology* 2009;49(S5):S72-S84.
12. Liaw YF. Hepatitis B virus replication and liver disease progression: the impact of antiviral therapy. *Antiviral therapy* 2006;11(6):669-79.

- 1  
2  
3  
4 13. Lok AS. Does antiviral therapy for hepatitis B and C prevent hepatocellular carcinoma?  
5 *J Gastroenterol Hepatol* 2011;26(2):221-7.  
6  
7  
8 14. EASL. EASL Clinical Practice Guidelines: Management of chronic hepatitis B virus  
9 infection. *J Hepatol* 2012.  
10  
11 15. Shamliyan TA, MacDonald R, Shaikat A, Taylor BC, Yuan J-M, Johnson JR, et al.  
12 Antiviral Therapy for Adults With Chronic Hepatitis B: A Systematic Review for a National  
13 Institutes of Health Consensus Development Conference. *Annals of Internal Medicine*  
14 2009;150(2):111-24.  
15  
16  
17 16. Yang YF, Zhao W, Zhong YD, Xia HM, Shen L, Zhang N. Interferon therapy in chronic  
18 hepatitis B reduces progression to cirrhosis and hepatocellular carcinoma: a meta-  
19 analysis. *Journal of viral hepatitis* 2009;16(4):265-71.  
20  
21  
22 17. Sung JJY, Tsoi KKF, Wong VWS, Li KCT, Chan HLY. Meta-analysis: treatment of  
23 hepatitis B infection reduces risk of hepatocellular carcinoma. *Alimentary Pharmacology &*  
24 *Therapeutics* 2008;28(9):1067-77.  
25  
26  
27 18. Shen YC, Hsu C, Cheng CC, Hu FC, Cheng AL. A Critical Evaluation of the Preventive  
28 Effect of Antiviral Therapy on the Development of Hepatocellular Carcinoma in Patients  
29 with Chronic Hepatitis C or B: A Novel Approach by Using Meta-Regression. *Oncology*  
30 2012;82(5):275-89.  
31  
32  
33 19. Papatheodoridis GV, Lampertico P, Manolakopoulos S, Lok A. Incidence of  
34 hepatocellular carcinoma in chronic hepatitis B patients receiving nucleos(t)ide therapy: a  
35 systematic review. *J Hepatol* 2010;53(2):348-56.  
36  
37  
38 20. Miyake Y, Kobashi H, Yamamoto K. Meta-analysis: the effect of interferon on  
39 development of hepatocellular carcinoma in patients with chronic hepatitis B virus  
40 infection. *Journal of gastroenterology* 2009;44(5):470-5.  
41  
42  
43 21. Zhang C-H, Xu G-L, Jia W-D, Li J-S, Ma J-L, Ge Y-S. Effects of interferon treatment on  
44 development and progression of hepatocellular carcinoma in patients with chronic virus  
45 infection: A meta-analysis of randomized controlled trials. *International Journal of Cancer*  
46 2011;129(5):1254-64.  
47  
48  
49 22. Singal AK, Fontana RJ. Meta-analysis: oral anti-viral agents in adults with  
50 decompensated hepatitis B virus cirrhosis. *Alimentary Pharmacology & Therapeutics*  
51 2012;35(6):674-89.  
52  
53  
54 23. Cammà C, Giunta M, Andreone P, Craxì A. Interferon and prevention of hepatocellular  
55 carcinoma in viral cirrhosis: an evidence-based approach. *Journal of Hepatology*  
56 2001;34(4):593-602.  
57  
58  
59  
60

- 1  
2  
3  
4 24. Baffis V, Shrier I. Use of Interferon for Prevention of Hepatocellular Carcinoma in  
5 Cirrhotic Patients with Hepatitis B or Hepatitis C Virus Infection. *Annals of Internal*  
6 *Medicine* 1999;131(9):696-701.  
7  
8  
9 25. Wong GLH, Yiu KKL, Wong VWS, Tsoi KKF, Chan HLY. Meta-analysis: reduction in  
10 hepatic events following interferon-alfa therapy of chronic hepatitis B. *Alimentary*  
11 *Pharmacology & Therapeutics* 2010;32(9):1059-68.  
12  
13 26. Manolakopoulos S, Karatapanis S, Elefsiniotis J, Mathou N, Vlachogiannakos J,  
14 Iliadou E, et al. Clinical course of lamivudine monotherapy in patients with decompensated  
15 cirrhosis due to HBeAg negative chronic HBV infection. *Am J Gastroenterol* 2004;99(1):57-  
16 63.  
17  
18  
19 27. Liaw Y-F, Sung JJY, Chow WC, Farrell G, Lee C-Z, Yuen H, et al. Lamivudine for  
20 Patients with Chronic Hepatitis B and Advanced Liver Disease. *New England Journal of*  
21 *Medicine* 2004;351(15):1521-31.  
22  
23  
24 28. Krogsgaard K, the Long-term Follow-up Investigator G, Executive Team on Anti-Viral  
25 T. The long-term effect of treatment with interferon- $\alpha$ 2a in chronic hepatitis B. *Journal of*  
26 *viral hepatitis* 1998;5(6):389-97.  
27  
28  
29 29. Higgins JP, Green S, (editors), editors. *Cochrane Handbook for Systematic Reviews of*  
30 *Interventions. Version 5.1.0 [updated March 2011]:* The Cochrane Collaboration,  
31 Cochrane Handbook for Systematic Reviews of Interventions. Version 5.1.0 [updated  
32 March 2011], 2011.  
33  
34  
35 30. Stroup DF, Berlin JA, Morton SC, Olkin I, Williamson GD, Rennie D, et al. Meta-  
36 analysis of observational studies in epidemiology: a proposal for reporting. Meta-analysis  
37 Of Observational Studies in Epidemiology (MOOSE) group. *JAMA : the journal of the*  
38 *American Medical Association* 2000;283(15):2008-12.  
39  
40  
41 31. EASL, EORTC. EASL-EORTC clinical practice guidelines: management of  
42 hepatocellular carcinoma. *J Hepatol* 2012;56(4):908-43.  
43  
44  
45 32. Colli A, Fraquelli M, Casazza G, Massironi S, Colucci A, Conte D, et al. Accuracy of  
46 ultrasonography, spiral CT, magnetic resonance, and alpha-fetoprotein in diagnosing  
47 hepatocellular carcinoma: a systematic review. *Am J Gastroenterol* 2006;101(3):513-23.  
48  
49  
50 33. Higgins J, Altman D, Sterne J, editors. *Chapter 8: Assessing risk of bias in included*  
51 *studies.:* The Cochrane Collaboration, Cochrane Handbook for Systematic Reviews of  
52 Interventions. Version 5.1.0 [updated March 2011], 2011.  
53  
54  
55  
56  
57  
58  
59  
60

- 1  
2  
3  
4 34. Wetterslev J, Thorlund K, Brok J, Gluud C. Trial sequential analysis may establish  
5 when firm evidence is reached in cumulative meta-analysis. *J Clin Epidemiol*  
6 2008;61(1):64-75.  
7  
8  
9 35. Anderson MG, Harrison TJ, Alexander G, Zuckerman AJ, Murray-Lyon IM.  
10 Randomised controlled trial of lymphoblastoid interferon for chronic active hepatitis B. *Gut*  
11 1987;28(5):619-22.  
12  
13 36. Benvegnù L, Chemello L, Noventa F, Fattovich G, Pontisso P, Alberti A. Retrospective  
14 analysis of the effect of interferon therapy on the clinical outcome of patients with viral  
15 cirrhosis. *Cancer* 1998;83(5):901-09.  
16  
17  
18 37. Bolukbas C, Bolukbas FF, Kendir T, Akbayir N, Ince AT, Abut E, et al. The  
19 effectiveness of lamivudine treatment in cirrhotic patients with HBV precore mutations: a  
20 prospective, open-label study. *Dig Dis Sci* 2006;51(7):1196-202.  
21  
22  
23 38. Brunetto MR, Oliveri F, Coco B, Leandro G, Colombatto P, Gorin JM, et al. Outcome of  
24 anti-HBe positive chronic hepatitis B in alpha-interferon treated and untreated patients: a  
25 long term cohort study. *Journal of Hepatology* 2002;36(2):263-70.  
26  
27  
28 39. Chan HL, Wang H, Niu J, Chim AM, Sung JJ. Two-year lamivudine treatment for  
29 hepatitis B e antigen-negative chronic hepatitis B: a double-blind, placebo-controlled trial.  
30 *Antiviral therapy* 2007;12(3):345-53.  
31  
32  
33 40. Chan SL, Mo FKF, Wong VWS, Liem GS, Wong GLH, Chan VTC, et al. Use of  
34 antiviral therapy in surveillance: impact on outcome of hepatitis B-related hepatocellular  
35 carcinoma. *Liver International* 2012;32(2):271-78.  
36  
37  
38 41. Das K, Das K, Datta S, Pal S, Hembram JR, Dhali GK, et al. Course of disease and  
39 survival after onset of decompensation in hepatitis B virus-related cirrhosis. *Liver*  
40 *International* 2010;30(7):1033-42.  
41  
42  
43 42. Di Marco V, Iacono OL, Cammà C, Vaccaro A, Giunta M, Martorana G, et al. The long-  
44 term course of chronic hepatitis B. *Hepatology* 1999;30(1):257-64.  
45  
46  
47 43. Farci P, Roskams T, Chessa L, Peddis G, Mazzoleni AP, Scioscia R, et al. Long-term  
48 benefit of interferon  $\alpha$  therapy of chronic hepatitis D: regression of advanced hepatic  
49 fibrosis. *Gastroenterology* 2004;126(7):1740-49.  
50  
51  
52 44. Fattovich G, Giustina G, Realdi G, Corrocher R, Schalm SW. Long-term outcome of  
53 hepatitis B e antigen-positive patients with compensated cirrhosis treated with interferon  
54 alfa. *Hepatology* 1997;26(5):1338-42.  
55  
56  
57 45. IIHCSG. Effect of interferon- $\alpha$  on progression of cirrhosis to hepatocellular carcinoma:  
58 a retrospective cohort study. *The Lancet* 1998;351(9115):1535-39.  
59  
60

- 1  
2  
3  
4 46. Ikeda K, Saitoh S, Suzuki Y, Kobayashi M, Tsubota A, Fukuda M, et al. Interferon  
5 decreases hepatocellular carcinogenesis in patients with cirrhosis caused by the hepatitis  
6 B virus. *Cancer* 1998;82(5):827-35.  
7  
8  
9 47. Lin CC, Wu JC, Chang TT, Huang YH, Wang YJ, Tsay SH, et al. Long-term evaluation  
10 of recombinant interferon  $\alpha$ 2b in the treatment of patients with hepatitis B e antigen-  
11 negative chronic hepatitis B in Taiwan. *Journal of viral hepatitis* 2001;8(6):438-46.  
12  
13 48. Lin SM, Yu ML, Lee CM, Chien RN, Sheen IS, Chu CM, et al. Interferon therapy in  
14 HBeAg positive chronic hepatitis reduces progression to cirrhosis and hepatocellular  
15 carcinoma. *J Hepatol* 2007;46(1):45-52.  
16  
17 49. Ma H, Wei L, Guo F, Zhu S, Sun Y, Wang H. Clinical features and survival in Chinese  
18 patients with hepatitis B e antigen-negative hepatitis B virus-related cirrhosis. *Journal of*  
19 *Gastroenterology and Hepatology* 2008;23(8pt1):1250-58.  
20  
21 50. Mahmood S, Niiyama G, Kamei A, Izumi A, Nakata K, Ikeda H, et al. Influence of viral  
22 load and genotype in the progression of Hepatitis B-associated liver cirrhosis to  
23 hepatocellular carcinoma. *Liver international : official journal of the International*  
24 *Association for the Study of the Liver* 2005;25(2):220-5.  
25  
26 51. Matsumoto A, Tanaka E, Rokuhara A, Kiyosawa K, Kumada H, Omata M, et al.  
27 Efficacy of lamivudine for preventing hepatocellular carcinoma in chronic hepatitis B: A  
28 multicenter retrospective study of 2795 patients. *Hepatology Research* 2005;32(3):173-84.  
29  
30 52. Mazzella G, Accogli E, Sottili S, Festi D, Orsini M, Salzetta A, et al. Alpha interferon  
31 treatment may prevent hepatocellular carcinoma in HCV-related liver cirrhosis. *J Hepatol*  
32 1996;24(2):141-47.  
33  
34 53. Mazzella G, Saracco G, Festi D, Rosina F, Marchetto S, Jaboli F, et al. Long-term  
35 results with interferon therapy in chronic type B hepatitis: a prospective randomized trial.  
36 *Am J Gastroenterol* 1999;94(8):2246-50.  
37  
38 54. Niederau C, Heintges T, Lange S, Goldmann G, Niederau CM, Mohr L, et al. Long-  
39 Term Follow-up of HBeAg-Positive Patients Treated with Interferon Alfa for Chronic  
40 Hepatitis B. *New England Journal of Medicine* 1996;334(22):1422-27.  
41  
42 55. Papatheodoridis GV, Manesis E, Hadziyannis SJ. The long-term outcome of interferon-  
43 alpha treated and untreated patients with HBeAg-negative chronic hepatitis B. *J Hepatol*  
44 2001;34(2):306-13.  
45  
46 56. Robson SC, Brice E, van Rensburg C, Kannemeyer J, Hift RJ, Kirsch RE. Safety and  
47 efficacy of interferon alpha-2b following prednisone withdrawal in the treatment of chronic  
48  
49  
50  
51  
52  
53  
54  
55  
56  
57  
58  
59  
60



1  
2  
3  
4 viral hepatitis B. A case-controlled, randomised study. *South African medical journal =*  
5 *Suid-Afrikaanse tydskrif vir geneeskunde* 1992;82(5):317-20.

6  
7  
8 57. Romeo R, Del Ninno E, Rumi M, Russo A, Sangiovanni A, de Franchis R, et al. A 28-  
9 Year Study of the Course of Hepatitis  $\Delta$  Infection: A Risk Factor for Cirrhosis and  
10 Hepatocellular Carcinoma. *Gastroenterology* 2009;136(5):1629-38.

11  
12 58. Tangkijvanich P, Thong-ngam D, Mahachai V, Kladchareon N, Suwangool P,  
13 Kullavanijaya P. Long-term effect of interferon therapy on incidence of cirrhosis and  
14 hepatocellular carcinoma in Thai patients with chronic hepatitis B. *The Southeast Asian*  
15 *journal of tropical medicine and public health* 2001;32(3):452-8.

16  
17  
18 59. Tong MJ, Blatt LM, Tyson KB, Kao VWC. Death from liver disease and development of  
19 hepatocellular carcinoma in patients with chronic hepatitis B virus infection: a prospective  
20 study. *Gastroenterol Hepatol* 2006;2:41-47.

21  
22  
23 60. Tong MJ, Hsien C, Song JJ, Kao JH, Sun HE, Hsu L, et al. Factors associated with  
24 progression to hepatocellular carcinoma and to death from liver complications in patients  
25 with HBsAg-positive cirrhosis. *Dig Dis Sci* 2009;54(6):1337-46.

26  
27  
28 61. Truong BX, Seo Y, Kato M, Hamano K, Ninomiya T, Katayama M, et al. Long-term  
29 follow-up of Japanese patients with chronic hepatitis B treated with interferon-alpha.  
30 *International journal of molecular medicine* 2005;16(2):279-84.

31  
32  
33 62. Waked I, Amin M, Abd el Fattah S, Osman LM, Sabbour MS. Experience with  
34 interferon in chronic hepatitis B in Egypt. *J Chemother* 1990;2(5):310-8.

35  
36  
37 63. Wong VW-S, Chan SL, Mo F, Chan T-C, Loong HH-F, Wong GL-H, et al. Clinical  
38 Scoring System to Predict Hepatocellular Carcinoma in Chronic Hepatitis B Carriers.  
39 *Journal of Clinical Oncology* 2010;28(10):1660-65.

40  
41  
42 64. Yuen M-F, Hui C-K, Cheng C-C, Wu C-H, Lai Y-P, Lai C-L. Long-term follow-up of  
43 interferon alfa treatment in chinese patients with chronic hepatitis B infection: The effect on  
44 hepatitis B e antigen seroconversion and the development of cirrhosis-related  
45 complications. *Hepatology* 2001;34(1):139-45.

46  
47  
48 65. Yuen M-F, Wong DK-H, Sablon E, Tse E, Ng IO-L, Yuan H-J, et al. HBsAg  
49 seroclearance in chronic hepatitis B in the Chinese: Virological, histological, and clinical  
50 aspects. *Hepatology* 2004;39(6):1694-701.

51  
52  
53 66. Yuen MF, Seto WK, Chow DH, Tsui K, Wong DK, Ngai VW, et al. Long-term  
54 lamivudine therapy reduces the risk of long-term complications of chronic hepatitis B  
55 infection even in patients without advanced disease. *Antiviral therapy* 2007;12(8):1295-  
56 303.



1  
2  
3  
4 67. Zampino R, Marrone A, Merola A, Trani B, Cirillo G, Karayiannis P, et al. Long-term  
5 outcome of hepatitis B and hepatitis C virus co-infection and single HBV infection acquired  
6 in youth. *Journal of medical virology* 2009;81(12):2012-20.  
7

8  
9 68. Psaty BM, Weiss NS, Furberg CD, Koepsell TD, Siscovick DS, Rosendaal FR, et al.  
10 Surrogate end points, health outcomes, and the drug-approval process for the treatment of  
11 risk factors for cardiovascular disease. *JAMA : the journal of the American Medical*  
12 *Association* 1999;282(8):786-90.  
13

14  
15 69. Odgaard-Jensen J, Vist GE, Timmer A, Kunz R, Akl EA, Schunemann H, et al.  
16 Randomisation to protect against selection bias in healthcare trials. *Cochrane Database*  
17 *Syst Rev* 2011(4):MR000012.  
18

19  
20 70. Kimer N, Dahl EK, Gluud LL, Krag A. Antiviral therapy for prevention of hepatocellular  
21 carcinoma in chronic hepatitis C: systematic review and meta-analysis of randomised  
22 controlled trials. *BMJ open* 2012;2(5).  
23

24  
25 71. Savovic J, Jones HE, Altman DG, Harris RJ, Juni P, Pildal J, et al. Influence of  
26 reported study design characteristics on intervention effect estimates from randomized,  
27 controlled trials. *Ann Intern Med* 2012;157(6):429-38.  
28  
29  
30  
31  
32  
33  
34  
35  
36  
37  
38  
39  
40  
41  
42  
43  
44  
45  
46  
47  
48  
49  
50  
51  
52  
53  
54  
55  
56  
57  
58  
59  
60

1  
2  
3  
4  
5  
6  
7  
8 **ANTIVIRAL THERAPY FOR PREVENTION OF**  
9  
10 **HEPATOCELLULAR CARCINOMA AND MORTALITY IN**  
11 **CHRONIC HEPATITIS B: SYSTEMATIC REVIEW AND META-**  
12 **ANALYSIS**  
13  
14  
15  
16  
17  
18  
19  
20

21 **Short title:** Antiviral therapy for hepatitis B  
22  
23  
24  
25

26 Maja Thiele *research associate*<sup>1</sup>, Lise-Lotte Gluud *associate professor*<sup>2</sup>, Emilie Kirstine  
27 Dahl *research assistant*<sup>3</sup>, Aleksander Krag *professor of hepatology*<sup>1</sup>.  
28  
29  
30  
31  
32

33 **Author affiliations:** <sup>1</sup>Department of Gastroenterology and Hepatology, Odense University  
34 Hospital, Sdr. Boulevard 29, DK-5000 Odense, Denmark; <sup>2</sup>Department of Medicine,  
35 Copenhagen University Hospital of Gentofte, Niels Andersensvej 65, DK-2900 Hellerup,  
36 Denmark; <sup>3</sup>Faculty of Health Sciences, University of Copenhagen, Blegdamsvej 3, DK-  
37 2100 Copenhagen, Denmark.  
38  
39  
40  
41  
42

43 **Correspondence to:** M. Thiele, Department of Gastroenterology and Hepatology, Odense  
44 University Hospital, Sdr. Boulevard 29, entrance 126, 2. floor, DK-5000 Odense C,  
45 Denmark. Email: maja.thiele@rsyd.dk  
46  
47  
48  
49

50 **Abstract word count: 298**  
51  
52

53 **Total word count: 57905955**  
54  
55  
56  
57  
58  
59  
60

## ABSTRACT

**Background:** The effect of antiviral therapy on clinical outcomes in chronic hepatitis B (HBV) is not established.

**Objectives:** To assess the effect of antiviral treatment (interferon and/or nucleo(t)side analogues) versus placebo or no intervention on prevention of hepatocellular carcinoma (HCC) and mortality in chronic hepatitis B.

**Design:** Random effects pair-wise meta-analysis of randomised trials and observational studies.

**Data sources:** Electronic and manual searches were combined.

**Study selection:** Randomised controlled trials (RCTs) were included in the primary analyses. Observational studies were included in sensitivity analyses.

**Data extraction:** Two independent reviewers extracted data and evaluated bias control. The primary outcome measures were HCC incidence and mortality.

**Data synthesis:** We included eight RCTs, eight prospective cohort studies and 19 case-control studies with a total of 3433 patients allocated to antiviral therapy and 4625 controls. The maximum duration of follow up was 23 years. Randomised trials found no effect of antiviral therapy on HCC or mortality. Cohort studies found that antiviral therapy increased the risk of HCC (risk ratio 1.43; 95% confidence interval 1.06 to 1.95) whereas case control studies found a decreased risk of HCC in the intervention group (risk ratio 0.69; 95% confidence interval 0.54 to 0.88). There was a clear difference between the results of RCTs and observational studies (test for subgroup differences  $P < 0.001$ ).

1  
2  
3  
4  
5  
6  
7  
8 Antiviral therapy did not affect mortality in cohort studies, but reduced mortality in case  
9 control studies (relative risk 0.71; 95% confidence interval 0.54 to 0.93; test for subgroup  
10 differences, P=0.406).  
11  
12

13  
14 **Conclusions:** The effect of antiviral therapy on clinical outcomes in HBV remains to be  
15 established. Although there was a positive effect in the sensitivity analyses, the strength of  
16 the evidence does not allow for extrapolation to clinical practice as research design plays  
17 an essential role in the overall assessment.  
18  
19  
20

21  
22  
23 **Trial registration number:** Prospero number CRD42013003881  
24  
25  
26  
27  
28  
29  
30  
31  
32  
33  
34  
35  
36  
37  
38  
39  
40  
41  
42  
43  
44  
45  
46  
47  
48  
49  
50  
51  
52  
53  
54  
55  
56  
57  
58  
59  
60

## ARTICLE SUMMARY

### Article focus

- The effect of antiviral treatment for chronic hepatitis B has been assessed using surrogate markers.
- An evaluation of the effect on hepatocellular carcinoma and mortality is missing.

### Key messages

- Research design plays an essential role on hepatocellular carcinoma incidence estimates. As prospective cohorts and case-control series show opposing results, reports from such trials should be interpreted with caution.
- Sensitivity analyses show a positive effect of treatment on mortality.

### Strengths and limitations of this study

- A large number of observational studies were included allowing for detailed sensitivity analyses with tests for subgroup differences.
- Only 8 randomised controlled trials were included.
- The effect of modern nucleos(t)ides could not be assessed as newer trials does not include placebo treated or untreated patients in the control groups.

## INTRODUCTION

Worldwide, two billion people have been infected with hepatitis B. Chronic hepatitis B (HBV) may lead to hepatocellular carcinoma (HCC), cirrhosis and liver failure and each year, about 600 000 people die due to hepatitis<sup>1-3</sup>. Globally, HCC is the fifth most common cause of cancer deaths in men, and the sixth in women<sup>4-6</sup>. Vaccine programs have decreased the incidence of HBV<sup>7 8</sup>, but mortality from HBV related HCC and cirrhosis is increasing due to the high prevalence of chronically infected patients<sup>9 10</sup>. The aim of antiviral treatment is to prevent progression to these clinical outcome measures<sup>11-13</sup>. Recommended treatments include interferon and nucleos(t)ide analogues (NA)<sup>14 15</sup>. A viral response may reduce the risk of HCC<sup>12</sup>, but the results of clinical studies and meta-analyses on antiviral therapy are not consistent<sup>16-24</sup>. One meta-analysis<sup>25</sup> found that antiviral therapy decreased liver-related mortality whereas a cohort series found decreased overall mortality in patients with a viral response to interferon<sup>26</sup>. On the other hand, RCTs have failed to show an effect on HCC or mortality<sup>27 28</sup>. We therefore conducted a systematic review of the evidence on antiviral treatment for prevention of HCC and mortality in patients with HBV.

## METHODS

### Scope

This systematic review evaluates the effects of antiviral therapy versus placebo or no intervention on prevention of HCC and mortality in patients with HBV. The review is based on a registered written protocol (Prospero number CRD42013003881) according to the methods specified in the Cochrane Handbook for Reviews on Interventions<sup>29</sup> and the MOOSE Guidelines for Meta-Analyses and Systematic Reviews of Observational Studies<sup>30</sup>. For a more detailed description of the methods, please see the MOOSE checklist (appendix 1).

### Data sources

Eligible trials were identified through electronic and manual searches. Electronic searches were performed in MEDLINE (1966-2012), EMBASE (1928-2012), and Web of Science (1900-2012). Literature searches included keywords for HCC, chronic hepatitis B, and antiviral treatment. Manual searches included scanning of reference lists in relevant papers and conference proceedings and the International Clinical Trials Registry Platform.

### Study selection

Our primary analyses included RCTs (primary analyses) on antiviral interventions (interferon and/or NA) versus placebo or no intervention for patients with HBV who had not previously received antiviral therapy (treatment naïve). Due to the expected prognosis and the duration of follow up necessary to evaluate intervention effects on clinical outcome measures in HBV, observational studies were included in sensitivity analyses. The primary outcome measures were HCC diagnosed using recommended criteria<sup>31 32</sup> and all-cause

1  
2  
3  
4  
5  
6  
7  
8 mortality. To avoid prevalent cases of HCC the outcomes were assessed after at least 12  
9 months of follow up. Some studies did not perform screening ultrasonography and would  
10 therefore not detect small HCC present at inclusion. Twelve months was therefore  
11 chosen as a limit. The secondary outcome measure was HCC related mortality.  
12  
13  
14  
15

### 16 **Data extraction and quality assessment**

17  
18 Two authors extracted data ~~in an~~ independently manner. When data were not available in  
19 the published reports, additional information was retrieved through correspondence with  
20 the primary investigators.  
21  
22  
23  
24

25 The Cochrane Collaboration's Tool for Assessing Risk of Bias was used to evaluate bias  
26 control in RCTs. The assessment included the randomisation methods (allocation  
27 sequence generation and allocation concealment), blinding (of participants, personnel and  
28 investigators), the completeness of outcome data, reporting of data and other biases<sup>33</sup>. All  
29 observational studies were classed as having a high risk of bias. Based on the MOOSE  
30 guidelines, the assessment of potential sources of bias within observational studies  
31 included documentation of how data were classified and coded (multiple raters, blinding  
32 and interrater reliability), assessment of confounding (comparability of cases and controls  
33 in studies where appropriate) and blinding of quality assessors, stratification or regression  
34 on possible predictors of study results.  
35  
36  
37  
38  
39  
40  
41  
42  
43  
44

### 45 **Data synthesis and analysis**

46  
47 Statistics were performed using Stata Version 12 (Statacorp, College Station, TX, USA)  
48 and Trial Sequential Analysis (CTU, Copenhagen, Denmark). Meta-analyses were  
49 performed with results expressed as risk ratios, 95% CI and  $I^2$  as a marker of  
50  
51  
52  
53  
54  
55  
56  
57  
58  
59  
60



1  
2  
3  
4  
5  
6  
7  
8 heterogeneity. For meta-analyses showing a statistically significant effect the number  
9 needed to treat was calculated based on the risk difference. Initial sensitivity analyses  
10 included repeating all meta-analyses using both random and fixed effect models. The  
11 results of these analyses were only reported if the conclusions differed. Regression  
12 analyses were performed to assess for publication bias and other small study effects  
13 (Egger's test). Sequential analyses were performed for meta-analyses showing an  
14 intervention effect after adjusting for the risk of bias associated with cumulative testing<sup>34</sup>.  
15 The sequential analysis was performed using a random-effects model, alpha (5%), power  
16 (80%) and the incidence rates and the intervention effects identified in the meta-analyses.  
17 Pre-planned sensitivity analyses were performed with inclusion of observational studies.  
18 These analyses were performed stratified by study design (RCT, prospective cohort or  
19 case-control study) and with fixed-effect inverse variance models that compared the  
20 results of subgroups. The result of the subgroup comparisons was expressed as P values  
21 (test for subgroup differences). Additional sensitivity analyses were performed to evaluate  
22 the influence of bias control (limiting the analysis to trials with adequate randomisation),  
23 the type of antiviral therapy (comparing interferon, NA or both), and the effect HCC  
24 screening (comparing the results of trials with or without screening). Finally, subgroup  
25 analyses including only patients with cirrhosis were performed.  
26  
27  
28  
29  
30  
31  
32  
33  
34  
35  
36  
37  
38  
39  
40  
41  
42  
43  
44  
45  
46  
47  
48  
49  
50  
51  
52  
53  
54  
55  
56  
57  
58  
59  
60

## RESULTS

### Literature searches and study inclusion

The electronic and manual searches identified 27 474 potentially relevant records (figure 1). After excluding duplicates and studies that did not fulfil our inclusion criteria, 36 references referring to eight RCTs, eight prospective cohort studies and 19 case control studies were included<sup>26-28 35-67</sup>.

### Characteristics of included RCTs and observational studies

The RCTs were conducted in Europe (n=4), Asia (n=2) and Africa (n=2). The duration of follow up ranged from one to 11 years. One trial performed HCC screening. Six trials assessed interferon and two trials NA (table 1). [A total of 840 patients received antiviral therapy and 447 patients received placebo or no intervention.](#) The proportion of men ranged from 70 to 100% and the mean age from 33 to 44 years. The proportion of patients with cirrhosis at inclusion ranged from zero to 66% (table 2). The proportion of patients with a virological response ranged from seven to 58% in the treatment group and from one to 22% of controls. A biochemical response was achieved for 14 to 66% of patients in the treatment and one to 20% of controls. The randomisation methods were described as adequate in three trials (table 3).

The prospective cohorts and case control studies were conducted in Europe (n=12), Asia (n=13), North America (n=1) and South America (n=1). The duration of follow up ranged from two to 23 years. HCC screening was performed in all prospective cohort studies and in 13 of the case control studies. Eighteen studies assessed interferon, seven assessed NA and two combined therapy with interferon and NA (table 1). [A total of 2593 patients](#)

1  
2  
3  
4  
5  
6  
7  
8 | [received antiviral therapy and 4178 patients received no intervention](#). The proportion of  
9  
10 | men ranged from 53 to 95% and the mean age from 27 to 65 years. The proportion of  
11  
12 | patients with cirrhosis ranged from zero to 100% (table 2). In the prospective cohorts, the  
13  
14 | proportion of patients with a virological response in the treatment and control groups was  
15  
16 | 23 to 69% and zero to 23%, respectively. A biochemical response was achieved for 23 to  
17  
18 | 69% of patients in the treatment groups and 31% in the control group (only reported in one  
19  
20 | study). In the case control series, the proportion of patients with a virological response in  
21  
22 | the treatment and control group ranged from 7 to 78% and two to 100%, respectively. A  
23  
24 | biochemical response in the two groups was 27 to 68% and four to 51%, respectively.

## 25 26 | **Prevention of HCC**

27  
28 | HCC was diagnosed in 22 of [840-768](#) patients in the treatment group versus 19 of [447-391](#)  
29  
30 | controls (relative risk 0.58; 95% confidence interval 0.32-1.07;  $I^2=0\%$ ). There was no  
31  
32 | evidence of small study effects (Egger's test,  $P=0.269$ ) and no difference between  
33  
34 | subgroups of trials assessing interferon or NA (test for subgroup differences  $P=0.854$ ).  
35  
36 | The overall result was confirmed in sensitivity analyses including RCTs with a low risk of  
37  
38 | bias and trials with HCC screening.

39  
40 | Sensitivity analyses including prospective cohort studies and case control studies were  
41  
42 | performed. In the cohort studies, HCC was diagnosed in 51 of [689-436](#) patients in the  
43  
44 | treatment group and 174 of [2283-1853](#). In the case control studies the numbers were 99 of  
45  
46 | [1904-1778](#) and 201 of [1895-1827](#) patients, respectively. A meta-analysis that combined  
47  
48 | RCTs and observational studies found no effect of antiviral therapy on HCC (relative risk  
49  
50 | 0.88; 95% confidence interval 0.73 to 1.05;  $I^2=63\%$ ). There was no evidence of small study  
51  
52 | effects (Egger's test  $P=0.730$ ). Subgroup analyses showed a clear difference between the  
53  
54

1  
2  
3  
4  
5  
6  
7  
8 RCTs, prospective cohorts and case control studies (test for subgroup differences  
9  $P < 0.001$ ) (figure 2). The prospective cohort studies found that antiviral therapy increased  
10 the risk of HCC (relative risk 1.44; 95% confidence interval 1.06 to 1.95) whereas the case  
11 control studies found that antiviral therapy reduced the risk of HCC (relative risk 0.69; 95%  
12 confidence interval 0.54 to 0.88). Due to the high heterogeneity, a post-hoc meta-  
13 regression analysis was performed. We evaluated study and patient characteristics not  
14 accounted for in the sensitivity analyses, which may have influenced the result. No  
15 modifiers were found when adjusting for the following variables: proportion of men  
16 (coefficient -0.074;  $P = 0.08$ ) mean age of treated patients at inclusion (coefficient 0.020;  
17  $P = 0.94$ ), mean age of untreated patients at inclusion (coefficient 0.121;  $P = 0.65$ ),  
18 proportion with cirrhosis at inclusion (coefficient -0.001;  $P = 0.76$ ), and region of trial  
19 (coefficient -0.394;  $P = 0.55$ ).

20  
21  
22  
23  
24  
25  
26  
27  
28  
29  
30  
31  
32 To further evaluate the influence of bias on overall results, we performed additional  
33 subgroup analysis in which trials were stratified for HCC screening. The analysis found  
34 eight trials that did not perform HCC screening (relative risk 0.40; 95% confidence interval  
35 0.26 to 0.63) and 18 trials that did perform HCC screening (relative risk 1.03; 95%  
36 confidence interval 0.84 to 1.25). The results of subgroups were clearly different (test for  
37 subgroup differences  $P < 0.001$ ).

38  
39  
40  
41  
42  
43  
44 Sensitivity analyses were performed to evaluate the risk of HCC among patients with  
45 cirrhosis. In the RCTs, one of 20 patients in the treatment group and two of 12 controls  
46 developed HCC (relative risk 0.75; 95% confidence interval 0.10 to 5.77). In the  
47 prospective cohort studies 32 of 184 versus 142 of 482 patients developed HCC whereas  
48 the numbers were 63 of 680 versus 161 of 955, respectively for case control studies.  
49  
50  
51  
52  
53  
54  
55  
56  
57  
58  
59  
60

1  
2  
3  
4  
5  
6  
7  
8 Overall, antiviral therapy reduced the risk of HCC when including data from RCTs and  
9 observational studies (relative risk 0.74; 95% confidence interval 0.57 to 0.96;  $I^2=0\%$ ;  
10 number needed to treat 28 patients) (fig 3). The results of RCTs and observational studies  
11 were similar (test for subgroup differences  $P=0.159$ ). There was no evidence of small  
12 study effects (Egger's test  $P=0.890$ ). In trial sequential analysis, the monitoring and alpha-  
13 spending boundary did not cross suggesting that the result was not robust to adjustment  
14 for multiple testing.  
15  
16  
17  
18  
19  
20

## 21 Mortality

22  
23  
24 In the RCTs, there was no difference in mortality between the treatment and control group  
25 (21 of [840-508](#) versus 9 of [447-271](#) patients; relative risk 1.24; 95% confidence interval  
26 0.58 to 2.66;  $I^2=0\%$ ). No evidence of small study effects (Egger's test  $P=0.783$ ) and no  
27 difference between trials stratified by treatment (test for subgroup differences  $P=0.668$ ) or  
28 HCC screening ( $P=0.828$ ). In the observational studies, the number of patients in the  
29 treatment and control groups who died was 51 of [689-655](#) versus 247 of [2283-2231](#) for  
30 prospective cohort studies and [794](#) of [4904-506](#) versus 92 of [4895-413](#) in the cohort  
31 studies. When combining RCTs and observational studies, random effects meta-analysis  
32 showed that antiviral treatment decreased mortality (relative risk 0.76; 95% confidence  
33 interval 0.62 to 0.95;  $I^2=14\%$ ; number needed to treat 77; Egger's test  $P=0.487$ ) (fig 4).  
34  
35  
36 There was no difference between RCTs and observational studies (test for subgroup  
37 differences  $P=0.406$ ). In the trial sequential analysis, the monitoring boundary crossed the  
38 alpha-spending boundary in 2004 suggesting that the meta-analysis was robust to  
39 adjustments for multiple testing.  
40  
41  
42  
43  
44  
45  
46  
47  
48  
49  
50  
51  
52  
53  
54  
55  
56  
57  
58  
59  
60

1  
2  
3  
4  
5  
6  
7  
8 Only observational studies reported mortality in patients with cirrhosis. The number of  
9  
10 patients who died in the intervention and control groups was 36 of ~~864-298~~ versus 141 of ~~4~~  
11 ~~477499~~ (relative risk 0.61; 95% confidence interval 0.44 to 0.86;  $I^2=9%$ ; number needed to  
12  
13 treat 16 patients). There were no small study effects (Egger's test  $P=0.533$ ) and no  
14  
15 difference between prospective cohort and case control studies (test for subgroup  
16  
17 differences  $P=0.292$ ).  
18  
19

### 20 **HCC related mortality**

21  
22 Antiviral therapy had no effect on HCC related mortality (3 of ~~840-282~~ versus 2 of ~~447154~~;  
23  
24 relative risk 0.50; 95% confidence interval 0.10 to 2.44;  $I^2=0%$ ,  $n=2$  RCT). Including data  
25  
26 from observational studies had little influence on the overall result (~~41-38~~ of ~~3433-1233~~  
27  
28 versus ~~146-144~~ of ~~46252632~~; relative risk 0.83; 95% confidence interval 0.5 to 1.20;  
29  
30  $I^2=0%$ ; Egger's test  $P=0.248$ ). There was no difference between subgroups of trials  
31  
32 stratified by design (test for subgroup differences  $P=0.481$ ).  
33  
34  
35  
36  
37  
38  
39  
40  
41  
42  
43  
44  
45  
46  
47  
48  
49  
50  
51  
52  
53  
54  
55  
56  
57  
58  
59  
60

## DISCUSSION

This systematic review found that the evidence of the effect of antiviral therapy on clinical outcomes in HBV is weak. RCTs found no benefit of treatment on HCC, mortality or HCC related mortality in HBV. The total number of patients and duration of follow up may be too small to determine clinical effects. The inclusion of observational studies did not strengthen the overall findings because there was clear evidence of bias suggesting that the study design was closely related to the estimated treatment effects. The prospective cohort studies found that antiviral therapy increased the risk of HCC and had no effect on mortality in HBV. The case control studies found that antiviral therapy reduced both HCC and mortality. These findings suggest that detection and ascertainment bias as well as confounding by indication had a considerable influence on the overall result, which may explain why previous meta-analyses have disagreed in their assessment of the benefit of antiviral therapy<sup>16-18 20 21 23 24</sup>. The importance of detection bias was underlined in the subgroup analysis of HCC screening. No intervention effect was found in trials that performed systematic HCC screening.

The main limitation of our review is the limited number of RCTs. Only one of the included trials had prevention of HCC as a primary outcome measure<sup>27</sup> and none were designed to evaluate the effect on mortality or HCC related mortality. Tests to evaluate the robustness of the results (including Egger's test) were difficult to interpret.

The current recommendation to treat patients with HBV is primarily based on surrogate outcomes. At present the evidence supporting the use of virological markers as surrogate outcomes is weak. The fact that some studies have found a correlation between a

Formatted: Danish, Check spelling and grammar, Not Superscript/ Subscript

Formatted: Danish, Check spelling and grammar, Not Superscript/ Subscript

Formatted: Danish, Check spelling and grammar, Not Superscript/ Subscript

Formatted: Danish, Check spelling and grammar, Not Superscript/ Subscript

Formatted: Danish, Check spelling and grammar, Not Superscript/ Subscript

1  
2  
3  
4  
5  
6  
7  
8 virological response and improved liver histology does not necessarily validate their use as  
9 surrogate outcomes. Previous evidence shows that interventions supported by surrogate  
10 markers may in fact have no benefit or even harmful effects on clinical outcome  
11 measures<sup>68</sup>. Still, our findings are not sufficiently convincing and do not allow for changes  
12 in clinical practice.  
13  
14  
15  
16

17  
18 Another limitation of the current review is our failure to extract data for analyses of  
19 treatment responders versus non-responders. However, only six cases of HCC were  
20 reportedly diagnosed in patients with biochemical or viral treatment response. This  
21 suggests that treatment response does not lead to elimination of the HCC risk, but  
22 probably decreases HCC incidence compared to non- or partial-responders. This would be  
23 in line with previous findings<sup>19 25</sup>. The majority of included trials in the current review  
24 assessed first generation NA and interferon, as reflected in low response rates. It was  
25 however not within the scope of the review to investigate modern antiviral treatments, as  
26 we included untreated control groups. Newer treatments will likely result in more patients  
27 achieving sustained suppression of HBV-DNA. It is therefore possible that the current  
28 review underestimates a potential treatment effect. It would also have been of interest had  
29 we been able to adjust for other common risk factors for HCC such as non-alcoholic  
30 steatohepatitis, alcoholic liver disease and coinfection with hepatitis C, hepatitis D and  
31 human immunodeficiency virus. Although these data were extracted, there was not  
32 enough data to allow for analyses.  
33  
34  
35  
36  
37  
38  
39  
40  
41  
42  
43  
44  
45  
46

47 There are several potential explanations for the discrepancies between RCTs and  
48 observational studies<sup>69</sup>. The fact that only prospective cohort studies found an increased  
49 risk of HCC among patients receiving antiviral therapy opposes speculations that the  
50  
51  
52  
53  
54  
55  
56  
57  
58  
59  
60



1  
2  
3  
4  
5  
6  
7  
8 treatment affected HCC development. The findings are more likely to reflect baseline  
9 differences in the viral load, genotype and degree of liver disease. The degree of  
10 monitoring in the treatment and control group is also likely to differ and may lead to  
11 detection bias. The importance of detection bias is further supported by the subgroup  
12 differences observed according to HCC screening. The case control studies are likely to  
13 have an even higher risk of bias, as confounding by indication and ascertainment bias is  
14 likely to exist in retrospective studies. Reporting bias should also be considered<sup>33</sup>.  
15  
16  
17  
18  
19  
20

21  
22 The subgroup differences with regards to type of intervention suggests a possible anti-  
23 carcinogenic effect of interferon, as seen in HCV<sup>70</sup>. We additionally found a decrease in  
24 both HCC incidence and overall mortality in sensitivity analyses of patients with cirrhosis.  
25  
26 This could support the case for continued treatment of patients with cirrhosis.  
27  
28  
29

30 We found a beneficial effect of interferon and/or NA on mortality in HBV when including  
31 RCTs and observational studies in chronic HBV patients. The assessment of mortality is  
32 robust to bias<sup>71</sup>. Accordingly, our subgroup analysis showed no clear relation between the  
33 results and the study design. HCC mortality is more prone to bias. Whether antiviral  
34 treatment for HBV decreases mortality except from HCC is unknown.  
35  
36  
37  
38  
39

40 In conclusion, antiviral treatment for HBV has no proven effect on the clinical outcomes  
41 HCC and mortality. Bias has a paramount impact on treatment effect estimates in  
42 observational studies and we recommend a critical approach to conclusions drawn in such  
43 studies. Future trials on antiviral treatment for HBV should be designed to show an effect  
44 on clinical endpoints rather than surrogate markers.  
45  
46  
47  
48  
49  
50

1  
2  
3  
4  
5  
6  
7  
8 **Contributors:** MT, LLG and AK conceived the idea and design. MT and EKD collected  
9 and assembled data. MT, LLG and AK analysed and interpreted the data. MT and LLG  
10 drafted the manuscript. LLG, EKD and AK revised the manuscript for important intellectual  
11 content. All authors discussed and approved of the final version of the manuscript. MT is  
12 guarantor.  
13  
14  
15  
16

17  
18 **Competing interests:** All authors have completed the ICMJE uniform disclosure form at  
19 [www.icmje.org/coi\\_disclosure.pdf](http://www.icmje.org/coi_disclosure.pdf) (available on request from the corresponding author)  
20 and declare: no support from any organisation for the submitted work; no financial  
21 relationships with any organisations that might have an interest in the submitted work in  
22 the previous three years; no other relationships or activities that could appear to have  
23 influenced the submitted work.  
24  
25  
26  
27  
28

29  
30 **Ethical approval:** Not required.  
31  
32

33 **Data sharing:** Dataset available from the corresponding author.  
34  
35

36 **Licence statement:** Corresponding Author has the right to grant on behalf of all authors  
37 and does grant on behalf of all authors, an exclusive licence (or non exclusive for  
38 government employees) on a worldwide basis to the BMJ Publishing Group Ltd to permit  
39 this article (if accepted) to be published in BMJ editions and any other BMJ PGL products  
40 and sublicences such use and exploit all subsidiary rights, as set out in our licence.  
41  
42  
43  
44  
45  
46  
47  
48  
49  
50  
51  
52  
53  
54  
55  
56  
57  
58  
59  
60

## FIGURE LEGENDS

*Figure 1. Study flow diagram.*

*Figure 2. Random effects inverse variance meta-analysis of antiviral therapy treatment effect on hepatocellular carcinoma in patients with chronic hepatitis B, subgroups according to trial design.*

*Figure 3. Random effects inverse variance meta-analysis of antiviral therapy treatment effect on hepatocellular carcinoma in patients with chronic hepatitis B and cirrhosis, subgroups according to trial design.*

*Figure 4. Random effects inverse variance meta-analysis of antiviral therapy treatment effect on mortality in patients with chronic hepatitis B, subgroups according to trial design.*

## REFERENCES

1. WHO. Position Paper: Hepatitis B. *WHO Weekly Epidemiological Report: World Health Organization*, 2009.
2. Perz JF, Armstrong GL, Farrington LA, Hutin YJF, Bell BP. The contributions of hepatitis B virus and hepatitis C virus infections to cirrhosis and primary liver cancer worldwide. *J Hepatol* 2006;45(4):529-38.
3. WHO. Hepatitis C Fact Sheet. <http://www.who.int/mediacentre/factsheets/fs164/en/index.html>: World Health Organization, 2012.
4. Ferlay J, Shin HR, Bray F, Forman D, Mathers C, Parkin DM. GLOBOCAN 2008 v2.0, Cancer Incidence and Mortality Worldwide: IARC CancerBase No. 10. Lyon, France: International Agency for Research on Cancer, 2010.
5. El-Serag HB. Hepatocellular carcinoma. *N Engl J Med* 2011;365(12):1118-27.
6. El-Serag HB. Epidemiology of Viral Hepatitis and Hepatocellular Carcinoma. *Gastroenterology* 2012;142(6):1264-73.e1.
7. Ni Y-H, Chang M-H, Wu J-F, Hsu H-Y, Chen H-L, Chen D-S. Minimization of hepatitis B infection by a 25-year universal vaccination program. *Journal of Hepatology* 2012;57(4):730-35.
8. Ott JJ, Stevens GA, Groeger J, Wiersma ST. Global epidemiology of hepatitis B virus infection: New estimates of age-specific HBsAg seroprevalence and endemicity. *Vaccine* 2012;30(12):2212-19.
9. Ly KN, Jian X, Klevens RM, Jiles RB, Ward JW, Holmberg SD. The Increasing Burden of Mortality From Viral Hepatitis in the United States Between 1999 and 2007. *Annals of Internal Medicine* 2012;156(4):271-W-52.
10. Fattovich G, Bortolotti F, Donato F. Natural history of chronic hepatitis B: Special emphasis on disease progression and prognostic factors. *Journal of Hepatology* 2008;48(2):335-52.
11. Chen CJ, Yang HI, Iloeje UH, The R-HBVSG. Hepatitis B virus DNA levels and outcomes in chronic hepatitis B. *Hepatology* 2009;49(S5):S72-S84.
12. Liaw YF. Hepatitis B virus replication and liver disease progression: the impact of antiviral therapy. *Antiviral therapy* 2006;11(6):669-79.

- 1  
2  
3  
4  
5  
6  
7  
8 13. Lok AS. Does antiviral therapy for hepatitis B and C prevent hepatocellular carcinoma?  
9 *J Gastroenterol Hepatol* 2011;26(2):221-7.  
10  
11 14. EASL. EASL Clinical Practice Guidelines: Management of chronic hepatitis B virus  
12 infection. *J Hepatol* 2012.  
13  
14 15. Shamliyan TA, MacDonald R, Shaikat A, Taylor BC, Yuan J-M, Johnson JR, et al.  
15 Antiviral Therapy for Adults With Chronic Hepatitis B: A Systematic Review for a National  
16 Institutes of Health Consensus Development Conference. *Annals of Internal Medicine*  
17 2009;150(2):111-24.  
18  
19 16. Yang YF, Zhao W, Zhong YD, Xia HM, Shen L, Zhang N. Interferon therapy in chronic  
20 hepatitis B reduces progression to cirrhosis and hepatocellular carcinoma: a meta-  
21 analysis. *Journal of viral hepatitis* 2009;16(4):265-71.  
22  
23 17. Sung JJY, Tsoi KKF, Wong VWS, Li KCT, Chan HLY. Meta-analysis: treatment of  
24 hepatitis B infection reduces risk of hepatocellular carcinoma. *Alimentary Pharmacology &*  
25 *Therapeutics* 2008;28(9):1067-77.  
26  
27 18. Shen YC, Hsu C, Cheng CC, Hu FC, Cheng AL. A Critical Evaluation of the Preventive  
28 Effect of Antiviral Therapy on the Development of Hepatocellular Carcinoma in Patients  
29 with Chronic Hepatitis C or B: A Novel Approach by Using Meta-Regression. *Oncology*  
30 2012;82(5):275-89.  
31  
32 19. Papatheodoridis GV, Lampertico P, Manolakopoulos S, Lok A. Incidence of  
33 hepatocellular carcinoma in chronic hepatitis B patients receiving nucleos(t)ide therapy: a  
34 systematic review. *J Hepatol* 2010;53(2):348-56.  
35  
36 20. Miyake Y, Kobashi H, Yamamoto K. Meta-analysis: the effect of interferon on  
37 development of hepatocellular carcinoma in patients with chronic hepatitis B virus  
38 infection. *Journal of gastroenterology* 2009;44(5):470-5.  
39  
40 21. Zhang C-H, Xu G-L, Jia W-D, Li J-S, Ma J-L, Ge Y-S. Effects of interferon treatment on  
41 development and progression of hepatocellular carcinoma in patients with chronic virus  
42 infection: A meta-analysis of randomized controlled trials. *International Journal of Cancer*  
43 2011;129(5):1254-64.  
44  
45 22. Singal AK, Fontana RJ. Meta-analysis: oral anti-viral agents in adults with  
46 decompensated hepatitis B virus cirrhosis. *Alimentary Pharmacology & Therapeutics*  
47 2012;35(6):674-89.  
48  
49 23. Cammà C, Giunta M, Andreone P, Craxi A. Interferon and prevention of hepatocellular  
50 carcinoma in viral cirrhosis: an evidence-based approach. *Journal of Hepatology*  
51 2001;34(4):593-602.  
52  
53  
54  
55  
56  
57  
58  
59  
60

- 1  
2  
3  
4  
5  
6  
7  
8 24. Baffis V, Shrier I. Use of Interferon for Prevention of Hepatocellular Carcinoma in  
9 Cirrhotic Patients with Hepatitis B or Hepatitis C Virus Infection. *Annals of Internal*  
10 *Medicine* 1999;131(9):696-701.  
11  
12 25. Wong GLH, Yiu KKL, Wong VWS, Tsoi KKF, Chan HLY. Meta-analysis: reduction in  
13 hepatic events following interferon-alfa therapy of chronic hepatitis B. *Alimentary*  
14 *Pharmacology & Therapeutics* 2010;32(9):1059-68.  
15  
16 26. Manolakopoulos S, Karatapanis S, Elefsiniotis J, Mathou N, Vlachogiannakos J,  
17 Iliadou E, et al. Clinical course of lamivudine monotherapy in patients with decompensated  
18 cirrhosis due to HBeAg negative chronic HBV infection. *Am J Gastroenterol* 2004;99(1):57-  
19 63.  
20  
21 27. Liaw Y-F, Sung JJY, Chow WC, Farrell G, Lee C-Z, Yuen H, et al. Lamivudine for  
22 Patients with Chronic Hepatitis B and Advanced Liver Disease. *New England Journal of*  
23 *Medicine* 2004;351(15):1521-31.  
24  
25 28. Krogsgaard K, the Long-term Follow-up Investigator G, Executive Team on Anti-Viral  
26 T. The long-term effect of treatment with interferon- $\alpha$ 2a in chronic hepatitis B. *Journal of*  
27 *viral hepatitis* 1998;5(6):389-97.  
28  
29 29. Higgins JP, Green S, (editors), editors. *Cochrane Handbook for Systematic Reviews of*  
30 *Interventions. Version 5.1.0 [updated March 2011]:* The Cochrane Collaboration,  
31 Cochrane Handbook for Systematic Reviews of Interventions. Version 5.1.0 [updated  
32 March 2011], 2011.  
33  
34 30. Stroup DF, Berlin JA, Morton SC, Olkin I, Williamson GD, Rennie D, et al. Meta-  
35 analysis of observational studies in epidemiology: a proposal for reporting. Meta-analysis  
36 Of Observational Studies in Epidemiology (MOOSE) group. *JAMA : the journal of the*  
37 *American Medical Association* 2000;283(15):2008-12.  
38  
39 31. EASL, EORCT. EASL-EORTC clinical practice guidelines: management of  
40 hepatocellular carcinoma. *J Hepatol* 2012;56(4):908-43.  
41  
42 32. Colli A, Fraquelli M, Casazza G, Massironi S, Colucci A, Conte D, et al. Accuracy of  
43 ultrasonography, spiral CT, magnetic resonance, and alpha-fetoprotein in diagnosing  
44 hepatocellular carcinoma: a systematic review. *Am J Gastroenterol* 2006;101(3):513-23.  
45  
46 33. Higgins J, Altman D, Sterne J, editors. *Chapter 8: Assessing risk of bias in included*  
47 *studies.:* The Cochrane Collaboration, Cochrane Handbook for Systematic Reviews of  
48 Interventions. Version 5.1.0 [updated March 2011], 2011.  
49  
50  
51  
52  
53  
54  
55  
56  
57  
58  
59  
60

- 1  
2  
3  
4  
5  
6  
7  
8 34. Wetterslev J, Thorlund K, Brok J, Gluud C. Trial sequential analysis may establish  
9 when firm evidence is reached in cumulative meta-analysis. *J Clin Epidemiol*  
10 2008;61(1):64-75.  
11  
12 35. Anderson MG, Harrison TJ, Alexander G, Zuckerman AJ, Murray-Lyon IM.  
13 Randomised controlled trial of lymphoblastoid interferon for chronic active hepatitis B. *Gut*  
14 1987;28(5):619-22.  
15  
16 36. Benvegnù L, Chemello L, Noventa F, Fattovich G, Pontisso P, Alberti A. Retrospective  
17 analysis of the effect of interferon therapy on the clinical outcome of patients with viral  
18 cirrhosis. *Cancer* 1998;83(5):901-09.  
19  
20 37. Bolukbas C, Bolukbas FF, Kendir T, Akbayir N, Ince AT, Abut E, et al. The  
21 effectiveness of lamivudine treatment in cirrhotic patients with HBV precore mutations: a  
22 prospective, open-label study. *Dig Dis Sci* 2006;51(7):1196-202.  
23  
24 38. Brunetto MR, Oliveri F, Coco B, Leandro G, Colombatto P, Gorin JM, et al. Outcome of  
25 anti-HBe positive chronic hepatitis B in alpha-interferon treated and untreated patients: a  
26 long term cohort study. *Journal of Hepatology* 2002;36(2):263-70.  
27  
28 39. Chan HL, Wang H, Niu J, Chim AM, Sung JJ. Two-year lamivudine treatment for  
29 hepatitis B e antigen-negative chronic hepatitis B: a double-blind, placebo-controlled trial.  
30 *Antiviral therapy* 2007;12(3):345-53.  
31  
32 40. Chan SL, Mo FKF, Wong VWS, Liem GS, Wong GLH, Chan VTC, et al. Use of  
33 antiviral therapy in surveillance: impact on outcome of hepatitis B-related hepatocellular  
34 carcinoma. *Liver International* 2012;32(2):271-78.  
35  
36 41. Das K, Das K, Datta S, Pal S, Hembram JR, Dhali GK, et al. Course of disease and  
37 survival after onset of decompensation in hepatitis B virus-related cirrhosis. *Liver*  
38 *International* 2010;30(7):1033-42.  
39  
40 42. Di Marco V, Iacono OL, Cammà C, Vaccaro A, Giunta M, Martorana G, et al. The long-  
41 term course of chronic hepatitis B. *Hepatology* 1999;30(1):257-64.  
42  
43 43. Farci P, Roskams T, Chessa L, Peddis G, Mazzoleni AP, Scioscia R, et al. Long-term  
44 benefit of interferon  $\alpha$  therapy of chronic hepatitis D: regression of advanced hepatic  
45 fibrosis. *Gastroenterology* 2004;126(7):1740-49.  
46  
47 44. Fattovich G, Giustina G, Realdi G, Corrocher R, Schalm SW. Long-term outcome of  
48 hepatitis B e antigen-positive patients with compensated cirrhosis treated with interferon  
49 alfa. *Hepatology* 1997;26(5):1338-42.  
50  
51 45. IIHCSG. Effect of interferon- $\alpha$  on progression of cirrhosis to hepatocellular carcinoma:  
52 a retrospective cohort study. *The Lancet* 1998;351(9115):1535-39.  
53  
54  
55  
56  
57  
58  
59  
60

- 1  
2  
3  
4  
5  
6  
7  
8 46. Ikeda K, Saitoh S, Suzuki Y, Kobayashi M, Tsubota A, Fukuda M, et al. Interferon  
9 decreases hepatocellular carcinogenesis in patients with cirrhosis caused by the hepatitis  
10 B virus. *Cancer* 1998;82(5):827-35.  
11
- 12 47. Lin CC, Wu JC, Chang TT, Huang YH, Wang YJ, Tsay SH, et al. Long-term evaluation  
13 of recombinant interferon  $\alpha$ 2b in the treatment of patients with hepatitis B e antigen-  
14 negative chronic hepatitis B in Taiwan. *Journal of viral hepatitis* 2001;8(6):438-46.  
15
- 16 48. Lin SM, Yu ML, Lee CM, Chien RN, Sheen IS, Chu CM, et al. Interferon therapy in  
17 HBeAg positive chronic hepatitis reduces progression to cirrhosis and hepatocellular  
18 carcinoma. *J Hepatol* 2007;46(1):45-52.  
19
- 20 49. Ma H, Wei L, Guo F, Zhu S, Sun Y, Wang H. Clinical features and survival in Chinese  
21 patients with hepatitis B e antigen-negative hepatitis B virus-related cirrhosis. *Journal of*  
22 *Gastroenterology and Hepatology* 2008;23(8pt1):1250-58.  
23
- 24 50. Mahmood S, Niiyama G, Kamei A, Izumi A, Nakata K, Ikeda H, et al. Influence of viral  
25 load and genotype in the progression of Hepatitis B-associated liver cirrhosis to  
26 hepatocellular carcinoma. *Liver international : official journal of the International*  
27 *Association for the Study of the Liver* 2005;25(2):220-5.  
28
- 29 51. Matsumoto A, Tanaka E, Rokuhara A, Kiyosawa K, Kumada H, Omata M, et al.  
30 Efficacy of lamivudine for preventing hepatocellular carcinoma in chronic hepatitis B: A  
31 multicenter retrospective study of 2795 patients. *Hepatology Research* 2005;32(3):173-84.  
32
- 33 52. Mazzella G, Accogli E, Sottili S, Festi D, Orsini M, Salzetta A, et al. Alpha interferon  
34 treatment may prevent hepatocellular carcinoma in HCV-related liver cirrhosis. *J Hepatol*  
35 1996;24(2):141-47.  
36
- 37 53. Mazzella G, Saracco G, Festi D, Rosina F, Marchetto S, Jaboli F, et al. Long-term  
38 results with interferon therapy in chronic type B hepatitis: a prospective randomized trial.  
39 *Am J Gastroenterol* 1999;94(8):2246-50.  
40
- 41 54. Niederau C, Heintges T, Lange S, Goldmann G, Niederau CM, Mohr L, et al. Long-  
42 Term Follow-up of HBeAg-Positive Patients Treated with Interferon Alfa for Chronic  
43 Hepatitis B. *New England Journal of Medicine* 1996;334(22):1422-27.  
44
- 45 55. Papatheodoridis GV, Manesis E, Hadziyannis SJ. The long-term outcome of interferon-  
46 alpha treated and untreated patients with HBeAg-negative chronic hepatitis B. *J Hepatol*  
47 2001;34(2):306-13.  
48
- 49 56. Robson SC, Brice E, van Rensburg C, Kannemeyer J, Hift RJ, Kirsch RE. Safety and  
50 efficacy of interferon alpha-2b following prednisone withdrawal in the treatment of chronic  
51  
52  
53  
54  
55  
56  
57  
58  
59  
60



- 1  
2  
3  
4  
5  
6  
7  
8 viral hepatitis B. A case-controlled, randomised study. *South African medical journal =*  
9 *Suid-Afrikaanse tydskrif vir geneeskunde* 1992;82(5):317-20.
- 10  
11 57. Romeo R, Del Ninno E, Rumi M, Russo A, Sangiovanni A, de Franchis R, et al. A 28-  
12 Year Study of the Course of Hepatitis  $\Delta$  Infection: A Risk Factor for Cirrhosis and  
13 Hepatocellular Carcinoma. *Gastroenterology* 2009;136(5):1629-38.
- 14  
15 58. Tangkijvanich P, Thong-ngam D, Mahachai V, Kladchareon N, Suwangool P,  
16 Kullavanijaya P. Long-term effect of interferon therapy on incidence of cirrhosis and  
17 hepatocellular carcinoma in Thai patients with chronic hepatitis B. *The Southeast Asian*  
18 *journal of tropical medicine and public health* 2001;32(3):452-8.
- 19  
20 59. Tong MJ, Blatt LM, Tyson KB, Kao VWC. Death from liver disease and development of  
21 hepatocellular carcinoma in patients with chronic hepatitis B virus infection: a prospective  
22 study. *Gastroenterol Hepatol* 2006;2:41-47.
- 23  
24 60. Tong MJ, Hsien C, Song JJ, Kao JH, Sun HE, Hsu L, et al. Factors associated with  
25 progression to hepatocellular carcinoma and to death from liver complications in patients  
26 with HBsAg-positive cirrhosis. *Dig Dis Sci* 2009;54(6):1337-46.
- 27  
28 61. Truong BX, Seo Y, Kato M, Hamano K, Ninomiya T, Katayama M, et al. Long-term  
29 follow-up of Japanese patients with chronic hepatitis B treated with interferon-alpha.  
30 *International journal of molecular medicine* 2005;16(2):279-84.
- 31  
32 62. Waked I, Amin M, Abd el Fattah S, Osman LM, Sabbour MS. Experience with  
33 interferon in chronic hepatitis B in Egypt. *J Chemother* 1990;2(5):310-8.
- 34  
35 63. Wong VW-S, Chan SL, Mo F, Chan T-C, Loong HH-F, Wong GL-H, et al. Clinical  
36 Scoring System to Predict Hepatocellular Carcinoma in Chronic Hepatitis B Carriers.  
37 *Journal of Clinical Oncology* 2010;28(10):1660-65.
- 38  
39 64. Yuen M-F, Hui C-K, Cheng C-C, Wu C-H, Lai Y-P, Lai C-L. Long-term follow-up of  
40 interferon alfa treatment in chinese patients with chronic hepatitis B infection: The effect on  
41 hepatitis B e antigen seroconversion and the development of cirrhosis-related  
42 complications. *Hepatology* 2001;34(1):139-45.
- 43  
44 65. Yuen M-F, Wong DK-H, Sablon E, Tse E, Ng IO-L, Yuan H-J, et al. HBsAg  
45 seroclearance in chronic hepatitis B in the Chinese: Virological, histological, and clinical  
46 aspects. *Hepatology* 2004;39(6):1694-701.
- 47  
48 66. Yuen MF, Seto WK, Chow DH, Tsui K, Wong DK, Ngai VW, et al. Long-term  
49 lamivudine therapy reduces the risk of long-term complications of chronic hepatitis B  
50 infection even in patients without advanced disease. *Antiviral therapy* 2007;12(8):1295-  
51 303.
- 52  
53  
54  
55  
56  
57  
58  
59  
60

- 1  
2  
3  
4  
5  
6  
7  
8 67. Zampino R, Marrone A, Merola A, Trani B, Cirillo G, Karayiannis P, et al. Long-term  
9 outcome of hepatitis B and hepatitis C virus co-infection and single HBV infection acquired  
10 in youth. *Journal of medical virology* 2009;81(12):2012-20.  
11
- 12 68. Psaty BM, Weiss NS, Furberg CD, Koepsell TD, Siscovick DS, Rosendaal FR, et al.  
13 Surrogate end points, health outcomes, and the drug-approval process for the treatment of  
14 risk factors for cardiovascular disease. *JAMA : the journal of the American Medical*  
15 *Association* 1999;282(8):786-90.  
16
- 17 69. Odgaard-Jensen J, Vist GE, Timmer A, Kunz R, Akl EA, Schunemann H, et al.  
18 Randomisation to protect against selection bias in healthcare trials. *Cochrane Database*  
19 *Syst Rev* 2011(4):MR000012.  
20
- 21 70. Kimer N, Dahl EK, Gluud LL, Krag A. Antiviral therapy for prevention of hepatocellular  
22 carcinoma in chronic hepatitis C: systematic review and meta-analysis of randomised  
23 controlled trials. *BMJ open* 2012;2(5).  
24
- 25 71. Savovic J, Jones HE, Altman DG, Harris RJ, Juni P, Pildal J, et al. Influence of  
26 reported study design characteristics on intervention effect estimates from randomized,  
27 controlled trials. *Ann Intern Med* 2012;157(6):429-38.  
28  
29  
30  
31  
32  
33  
34  
35  
36  
37  
38  
39  
40  
41  
42  
43  
44  
45  
46  
47  
48  
49  
50  
51  
52  
53  
54  
55  
56  
57  
58  
59  
60
